# Supplementary material for: Stereoselective construction of the tetracyclic core of Cryptotrione
Source: Royal Society of Chemistry journal article supplement (doi:10.1039/c2ob25923k), 2012-01-01

# Stereoselective Construction of the Tetracyclic Core of Cryptotrione

Song Chen,<sup>a</sup> Chao Rong,<sup>a</sup> Pengju Feng,<sup>a</sup> Songlei Li,<sup>a</sup> and Yian Shi<sup>\*a,b</sup>

<sup>a</sup> *Beijing National Laboratory for Molecular Sciences, CAS Key Laboratory of Molecular Recognition and Function, Institute of Chemistry, Chinese Academy of Sciences, Beijing 100190, China.*

<sup>b</sup> *Department of Chemistry, Colorado State University, Fort Collins, Colorado 80523*

## Supporting Information

### Table of Contents

|                                                |      |
|------------------------------------------------|------|
| General methods                                | S-2  |
| Experimental Procedures and Spectroscopic Data | S-2  |
| X-ray Structure of Compound <b>15</b>          | S-15 |
| Experimental Spectra                           | S-33 |

**General Methods.** All commercially available reagents were used without further purification. All solvents were freshly distilled under nitrogen from appropriate drying agents before use. Tetrahydrofuran was distilled from sodium-benzophenone. Dichloromethane and acetonitrile were distilled from CaH<sub>2</sub>. *N,N*-Dimethylformamide and dimethylsulfoxide were dried over 4 Å molecular sieves (activated at 180 °C in vacuo over 8 h). Column chromatography was performed on silica gel (200-300 mesh). <sup>1</sup>H NMR spectra were recorded on a 400 MHz NMR spectrometer and <sup>13</sup>C NMR spectra were recorded on a 100 MHz NMR spectrometer. IR spectra were recorded on a FT-IR spectrometer. Melting points were uncorrected.

### Experimental Procedures and Spectroscopic Data

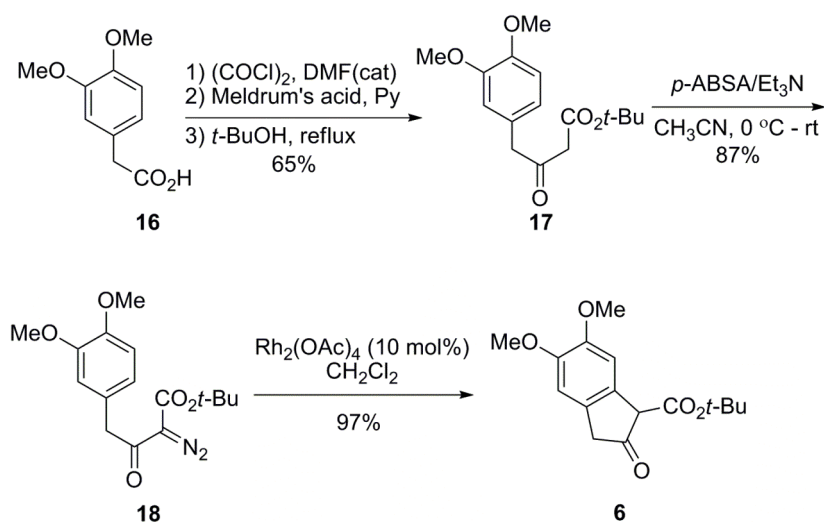

**Tert-butyl 4-(3,4-dimethoxyphenyl)-3-oxobutanoate (17).** To a solution of homoveratric acid **16** (3.92 g, 20.0 mmol) in CH<sub>2</sub>Cl<sub>2</sub> (40 mL) were added (COCl)<sub>2</sub> (10.15 g, 6.8 mL, 80.0 mmol) and DMF (0.05 mL) at 0 °C under N<sub>2</sub>. Upon stirring at 0 °C for 2 h and at rt for 4 h, the reaction mixture was concentrated. The residue was dissolved in CH<sub>2</sub>Cl<sub>2</sub> (5 mL) and was added to a solution of Meldrum's acid (3.17 g, 22.0 mmol) and pyridine (3.16 g, 3.2 mL, 40.0 mmol) in CH<sub>2</sub>Cl<sub>2</sub> (35 mL) at 0 °C. Upon stirring at 0 °C for 2 h and at rt overnight, the reaction mixture was washed with

aqueous 3N HCl (20 mL), extracted with CH<sub>2</sub>Cl<sub>2</sub> (20 mL x 3). The combined organic phases were washed with H<sub>2</sub>O (20 mL) and brine (20 mL), dried over Na<sub>2</sub>SO<sub>4</sub>, filtered, and concentrated. The crude mixture was dissolved in *t*-BuOH (20 mL), refluxed overnight, cooled, concentrated, and purified by flash column chromatography (silica gel, eluent: PE/EtOAc = 5/1) to give compound **17** as yellow solid (3.82 g; 65%). mp. 38-40 °C; IR (film): 1734, 1716, 1517, 1261 cm<sup>-1</sup>; <sup>1</sup>HNMR (400 MHz, CDCl<sub>3</sub>) δ 6.82 (d, *J* = 8.4 Hz, 1H), 6.74 (d, *J* = 8.0 Hz, 1H), 6.70 (s, 1H), 3.85 (s, 6H), 3.74 (s, 2H), 3.35 (s, 2H), 1.45 (s, 9H); <sup>13</sup>CNMR (100 MHz, CDCl<sub>3</sub>) δ 201.5, 166.6, 149.3, 148.5, 126.0, 122.0, 112.7, 111.6, 82.2, 56.1, 56.0, 49.7, 49.5, 28.1; HRMS Calcd for C<sub>16</sub>H<sub>23</sub>O<sub>5</sub> (M+H): 295.1540; Found: 295.1542.

***Tert*-butyl 2-diazo-4-(3,4-dimethoxyphenyl)-3-oxobutanoate (18).** To a solution of **17** (2.94 g, 10.0 mmol) in MeCN (50 mL) were added 4-acetamidobenzenesulfonyl azide (2.64 g, 11.0 mmol) and Et<sub>3</sub>N (4.05 g, 5.6 mL, 40.0 mmol) at 0 °C under N<sub>2</sub>. Upon stirring at rt for 3 h, the reaction mixture was quenched with saturated NaHCO<sub>3</sub> (25 mL), extracted with EtOAc (25 mL x 3), dried over Na<sub>2</sub>SO<sub>4</sub>, filtered, concentrated, and purified by flash column chromatography (silica gel, eluent: PE/EtOAc = 5/1) to give compound **18** as white solid (2.78 g, 87%). mp. 92-94 °C; IR (film): 2134, 1709, 1652, 1262 cm<sup>-1</sup>; <sup>1</sup>HNMR (400 MHz, CDCl<sub>3</sub>) δ 6.88-6.82 (m, 2H), 6.80 (d, *J* = 8.4 Hz, 1H), 4.10 (s, 2H), 3.86 (s, 3H), 3.85 (s, 3H), 1.53 (s, 9H); <sup>13</sup>CNMR (100 MHz, CDCl<sub>3</sub>) δ 191.1, 160.6, 149.0, 148.2, 126.9, 122.0, 113.0, 111.3, 83.4, 56.05, 55.96, 45.3, 28.5; Calcd for C<sub>16</sub>H<sub>20</sub>N<sub>2</sub>O<sub>5</sub>: C, 59.99; H, 6.29; N, 8.74; Found: C, 59.85; H, 6.26; N, 8.84.

***Tert*-butyl 5,6-dimethoxy-2-oxo-2,3-dihydro-1H-indene-1-carboxylate (6).** A solution of **18** (23.12 g, 72.0 mmol) in CH<sub>2</sub>Cl<sub>2</sub> (200 mL) was slowly added to a solution of Rh<sub>2</sub>(Ac)<sub>4</sub> (0.32 g, 0.72 mmol) in CH<sub>2</sub>Cl<sub>2</sub> (280 mL) via syringe pump over 1.5 h. Upon stirring at rt for 1 h, the reaction mixture was passed through a pad of silic gel, eluted with CH<sub>2</sub>Cl<sub>2</sub> (100 mL), and concentrated to give compound **6** as light

yellow solid (20.37 g, 97%). mp. 74-76 °C; IR (film): 1649, 1596, 1493, 1156  $\text{cm}^{-1}$ ;  $^1\text{H}$ NMR (400 MHz,  $\text{CDCl}_3$ )  $\delta$  10.97 (br, 1H), 7.23 (s, 1H), 6.90 (s, 1H), 3.89 (s, 3H), 3.86 (s, 3H), 3.47 (s, 2H), 1.64 (s, 9H);  $^{13}\text{C}$ NMR (100 MHz,  $\text{CDCl}_3$ )  $\delta$  179.6, 168.4, 148.7, 146.2, 133.1, 124.9, 108.8, 106.1, 104.9, 82.0, 56.6, 56.0, 37.6, 28.6; HRMS Calcd for  $\text{C}_{16}\text{H}_{21}\text{O}_5$  (M+H): 293.1384. Found: 293.1389.

U. K. Tambar, D. C. Ebner and B. M. Stoltz, *J. Am. Chem. Soc.*, 2006, **128**, 11752.

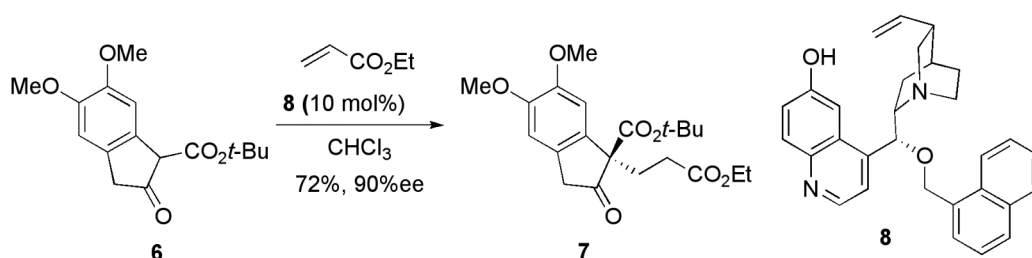

**(R)-tert-butyl 1-(3-ethoxy-3-oxopropyl)-5,6-dimethoxy-2-oxo-2,3-dihydro-1H-indene-1-carboxylate (7).** To a solution of **6** (5.85 g, 20.0 mmol) and ethyl acrylate (6.01 g, 6.5 mL, 60.0 mmol) in  $\text{CHCl}_3$  (40 mL) was added catalyst **8** (0.90 g, 2.0 mmol) at 25 °C. The reaction mixture was stirred at 25 °C for 60 h, concentrated, and purified by flash column chromatography (silica gel, eluent: PE/EtOAc = 5/1) to give compound **7** as colorless oil (5.62 g, 72%, 90% ee) (the ee was determined by chiral HPLC, chiralcel OD-H column, *i*-PrOH/hexane = 7/93, 0.5 mL/min,  $\lambda$  = 210 nm).  $[\alpha]_D^{20} = -24.1$  (*c* 1.16,  $\text{CHCl}_3$ ); IR (film): 1757, 1731, 1506, 1252  $\text{cm}^{-1}$ ;  $^1\text{H}$ NMR (400 MHz,  $\text{CDCl}_3$ )  $\delta$  6.82 (s, 1H), 6.73 (s, 1H), 4.07-3.92 (m, 2H), 3.87 (s, 3H), 3.85 (s, 3H), 3.66 (d,  $J = 22.4$  Hz, 1H), 3.38 (d,  $J = 22.4$  Hz, 1H), 2.52-2.41 (m, 1H), 2.39-2.28 (m, 1H), 2.06 (t,  $J = 8.0$  Hz, 2H), 1.30 (s, 9H), 1.15 (t,  $J = 7.2$  Hz, 3H);  $^{13}\text{C}$ NMR (100 MHz,  $\text{CDCl}_3$ )  $\delta$  212.4, 172.8, 169.4, 149.9, 149.5, 132.1, 129.5, 107.9, 106.6, 82.5, 65.2, 60.6, 56.3, 56.2, 43.5, 29.6, 28.5, 27.9, 14.3; HRMS Calcd for  $\text{C}_{21}\text{H}_{29}\text{O}_7$  (M+H): 393.1908. Found: 393.1912.

(a) C. L. Rigby and D. J. Dixon, *Chem. Commun.*, 2008, 3798.

(b) F. Wu, H. Li, R. Hong and L. Deng, *Angew. Chem., Int. Ed.*, 2006, **45**, 947.

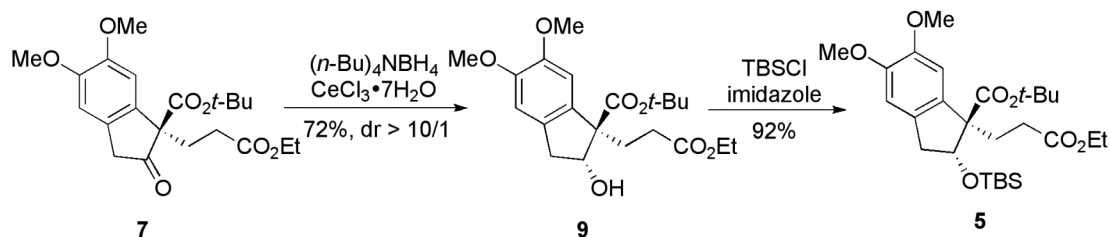

**(1R,2R)-tert-butyl 1-(3-ethoxy-3-oxopropyl)-2-hydroxy-5,6-dimethoxy-2,3-dihydro-1H-indene-1-carboxylate (9).** To a mixture of **7** (4.86 g, 12.4 mmol) and  $\text{CeCl}_3 \cdot 7\text{H}_2\text{O}$  (6.93 g, 18.6 mmol) in EtOH (62 mL) was added  $(n\text{-Bu})_4\text{NBH}_4$  (4.14 g, 16.1 mmol) at  $-78^\circ\text{C}$ . Upon stirring at  $-78^\circ\text{C}$  for 2 h and warming to rt, the reaction mixture was quenched with saturated  $\text{NH}_4\text{Cl}$  (20 mL), extracted with  $\text{CH}_2\text{Cl}_2$  (50 mL x 3), washed with brine (20 mL), dried over  $\text{Na}_2\text{SO}_4$ , filtered, concentrated, and purified by flash column chromatography (silica gel, eluent: PE/EtOAc = 5/1 to 2/1) to give **9** as colorless oil (3.54 g, 72%).  $[\alpha]_D^{20} = +30.3$  ( $c$  0.99,  $\text{CHCl}_3$ ); IR (film): 3515, 1719, 1504, 1251  $\text{cm}^{-1}$ ;  $^1\text{H}$ NMR (400 MHz,  $\text{CDCl}_3$ )  $\delta$  6.99 (s, 1H), 6.73 (s, 1H), 4.80 (dt,  $J = 4.8, 6.8$  Hz, 1H), 4.08 (q,  $J = 7.2$  Hz, 2 H), 3.88 (s, 3H), 3.85 (s, 3H), 3.19 (dd,  $J = 15.6, 6.8$  Hz, 1H), 2.81 (dd,  $J = 15.6, 6.8$  Hz, 1H), 2.48 (d,  $J = 4.8$  Hz, 1H), 2.31-2.42 (m, 2H), 2.10-2.26 (m, 2H), 1.47 (s, 9H), 1.22 (t,  $J = 7.2$  Hz, 3H);  $^{13}\text{C}$ NMR (100 MHz,  $\text{CDCl}_3$ )  $\delta$  173.7, 173.6, 149.4, 148.4, 133.3, 131.7, 109.1, 108.0, 81.7, 76.8, 61.3, 60.6, 56.2, 56.1, 38.6, 30.3, 28.2, 27.6, 14.3; HRMS Calcd for  $\text{C}_{21}\text{H}_{31}\text{O}_7$  (M+H): 395.2064; Found: 395.2056.

(a) M. Taniguchi, H. Fujii, K. Oshima and K. Utimoto, *Tetrahedron*, 1993, **49**, 11169  
(d) J. Gong, G. Lin, W. Sun, C.-C. Li and Z. Yang, *J. Am. Chem. Soc.*, 2010, **132**, 16745

**(1R,2R)-tert-butyl 2-(tert-butyldimethylsilyloxy)-1-(3-ethoxy-3-oxopropyl)-5,6-dimethoxy-2,3-dihydro-1H-indene-1-carboxylate (5).** To a solution of **9** (8.01 g, 20.0 mmol) in DMF (40 mL) were added imidazole (5.45 g, 80.0 mmol) and TBSCl (4.52 g, 30.0 mmol) under  $\text{N}_2$ . Upon stirring at rt for 11 h, the reaction mixture was quenched with water (20 mL), extracted with  $\text{Et}_2\text{O}$  (50 mL x 3), washed with brine (20 mL), dried over  $\text{Na}_2\text{SO}_4$ , filtered, concentrated, and purified by flash

column chromatography (silica gel, eluent: PE/EtOAc = 8/1) to give compound **5** as colorless oil (9.37 g, 92%).  $[\alpha]_D^{20} = -15.8$  ( $c$  1.20, CHCl<sub>3</sub>); IR (film): 1724, 1504, 1252, 1155 cm<sup>-1</sup>; <sup>1</sup>HNMR (400 MHz, CDCl<sub>3</sub>)  $\delta$  6.76 (s, 1H), 6.66 (s, 1H), 5.05 (t,  $J = 7.6$  Hz, 1H), 4.04 (q,  $J = 7.2$ , 2H), 3.84 (s, 6H), 3.11 (dd,  $J = 15.6, 7.6$  Hz, 1H), 2.77 (dd,  $J = 15.2, 7.6$  Hz, 1H), 2.42-2.33 (m, 1H), 2.32-2.21 (m, 2H), 2.20-2.10 (m, 1H), 1.46 (s, 9H), 1.20 (t,  $J = 7.2$  Hz, 3H), 0.90 (s, 9H), 0.12 (s, 3H), 0.11 (s, 3H); <sup>13</sup>CNMR (100 MHz, CDCl<sub>3</sub>)  $\delta$  174.0, 173.6, 149.4, 148.5, 134.4, 131.8, 108.1, 107.8, 81.1, 77.4, 61.9, 60.3, 56.2, 56.1, 40.6, 30.6, 28.3, 27.9, 26.0, 18.2, 14.4, -4.4, -4.7; HRMS Calcd for C<sub>27</sub>H<sub>45</sub>O<sub>7</sub>Si (M+H): 509.2929; Found: 509.2933.

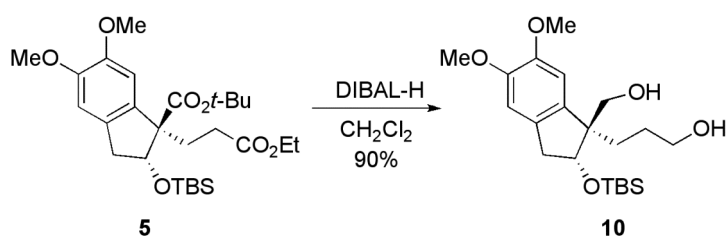

**3-((1*S*,2*R*)-2-(*tert*-butyldimethylsilyloxy)-1-(hydroxymethyl)-5,6-dimethoxy-2,3-dihydro-1*H*-inden-1-yl)propan-1-ol (10).** To a solution of **5** (3.28 g, 6.5 mmol) in CH<sub>2</sub>Cl<sub>2</sub> (65 mL) was added DIBAL-H (1 M in hexane) (32.5 mL, 32.5 mmol) at -78 °C under N<sub>2</sub>. Upon stirring at -78 °C for 15 min and at 0 °C for 1 h, the reaction mixture was quenched with MeOH (2 mL) and saturated sodium potassium tartrate (40 mL), stirred at rt for 0.5 h, extracted with CH<sub>2</sub>Cl<sub>2</sub> (50 mL x 3), washed with brine (50 mL), dried over MgSO<sub>4</sub>, filtered, concentrated, and purified by flash column chromatography (silica gel, eluent: PE/EtOAc = 1/5) to give compound **10** as white solid (2.32 g, 90%). mp. 76-78 °C;  $[\alpha]_D^{20} = -26.4$  ( $c$  1.00, CHCl<sub>3</sub>); IR (film): 3414, 1503, 1252, 1099 cm<sup>-1</sup>; <sup>1</sup>HNMR (400 MHz, CDCl<sub>3</sub>)  $\delta$  6.70 (s, 1H), 6.62 (s, 1H), 4.60 (t,  $J = 8.4$  Hz, 1H), 3.83 (s, 3H), 3.82 (s, 3H), 3.78 (d,  $J = 10.8$  Hz, 1H), 3.62 (d,  $J = 11.2$  Hz, 1H), 3.49 (t,  $J = 6.4$  Hz, 2H), 3.01 (dd,  $J = 15.2, 8.0$  Hz, 1H), 2.80 (dd,  $J = 15.2, 8.4$  Hz, 1H), 1.69-1.42 (m, 5H), 1.38-1.12 (m, 1H), 0.91 (s, 9H), 0.11 (s, 6H); <sup>13</sup>CNMR (100 MHz, CDCl<sub>3</sub>)  $\delta$  149.0, 148.7, 135.3, 132.6, 108.5, 107.0, 76.4, 66.9, 63.8, 56.4, 56.1, 55.2, 40.1, 28.3, 27.8, 26.0, 18.1, -4.2, -4.8; HRMS

Calcd for C<sub>21</sub>H<sub>37</sub>O<sub>5</sub>Si (M+H): 397.2405; Found: 397.2410.

(a) D. L. J. Clive, M. Yu and M. Sannigrahi, *J. Org. Chem.*, 2004, **69**, 4116

(b) K. Okura, S. Matsuoka, R. Goto and M. Inoue, *Angew. Chem., Int. Ed.*, 2010, **49**, 329

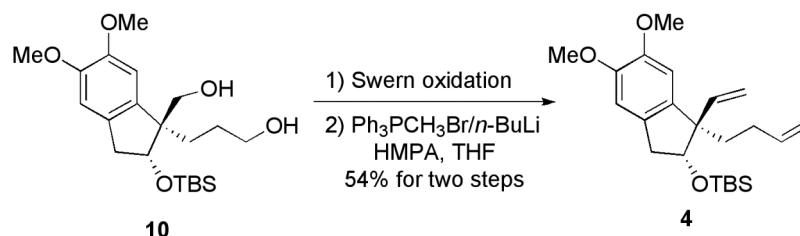

**((1*R*,2*R*)-1-(but-3-enyl)-5,6-dimethoxy-1-vinyl-2,3-dihydro-1H-inden-2-yl ox y) (tert-butyl)diethylsilane (4).** To a solution of (COCl)<sub>2</sub> (3.34 g, 2.6 mL, 26.3 mmol) in CH<sub>2</sub>Cl<sub>2</sub> (100 mL) was slowly added DMSO (4.11 g, 3.7 mL, 52.6 mmol) at -78 °C under N<sub>2</sub>. After the reaction mixture was stirred at -78 °C for 15 min, a solution of **10** (2.61 g, 6.58 mmol) in CH<sub>2</sub>Cl<sub>2</sub> (16 mL) was added. The resulting mixture was stirred at -78 °C for another 45 min. Upon addition of Et<sub>3</sub>N (5.86 g, 8.1 mL, 57.9 mmol), the reaction mixture was warmed to rt over 2 h, quenched with water (50 mL), extracted with CH<sub>2</sub>Cl<sub>2</sub> (50 mL x 3), washed with brine (50 mL), dried over MgSO<sub>4</sub>, filtered, and concentrated. The residue was dissolved in anhydrous Et<sub>2</sub>O (50 mL) and filtered to remove white solids. The filtrate was concentrated to give the aldehyde as yellow oil.

To a suspension of Ph<sub>3</sub>PCH<sub>3</sub>Br (10.34 g, 28.9 mmol) in THF (200 mL) was added *n*-BuLi (2.5 M in hexane) (10.5 mL, 26.3 mmol) at 0 °C under N<sub>2</sub>. Upon stirring at 0 °C for 1 h and subsequent addition of HMPA (9.43 g, 9.2 mL, 52.6 mmol), the reaction mixture was stirred at 0 °C for additional 15 min. At this point, a solution of the above aldehyde in THF (127 mL) was slowly added via syringe pump over 1 h. The resulting reaction mixture was stirred at 0 °C for 0.5 h, quenched with saturated NH<sub>4</sub>Cl (50 mL), extracted with EtOAc (50 mL x 3), washed with brine (50 mL), dried over Na<sub>2</sub>SO<sub>4</sub>, filtered, concentrated, and purified by flash column chromatography (silica gel, eluent: PE/EtOAc = 50/1) to give compound **4** as light

yellow oil (1.37 g, 54% for two steps).  $[\alpha]_D^{20} = +1.13$  ( $c$  1.06,  $\text{CHCl}_3$ ); IR (film): 1499, 1252, 1142  $\text{cm}^{-1}$ ;  $^1\text{H NMR}$  (400 MHz,  $\text{CDCl}_3$ )  $\delta$  6.72 (s, 1H), 6.60 (s, 1H), 5.97 (dd,  $J = 17.6, 10.8$  Hz, 1H), 5.35-5.20 (m, 1H), 5.16 (dd,  $J = 10.8, 1.2$  Hz, 1H), 5.11 (dd,  $J = 17.6, 1.2$  Hz, 1H), 4.94 (dd,  $J = 16.8, 1.6$  Hz, 1H), 4.90-4.83 (m, 1H), 4.33 (t,  $J = 8.4$  Hz, 1H), 3.85 (s, 6H), 2.98 (dd,  $J = 15.2, 7.6$  Hz, 1H), 2.82 (dd,  $J = 15.2, 8.4$  Hz, 1H), 2.11-1.97 (m, 1H), 1.96-1.82 (m, 1H), 1.81-1.65 (m, 2H), 0.92 (s, 9H), 0.08 (s, 3H), 0.06 (s, 3H);  $^{13}\text{C NMR}$  (100 MHz,  $\text{CDCl}_3$ )  $\delta$  148.6, 148.2, 144.8, 139.8, 137.7, 131.6, 114.2, 113.9, 109.0, 108.0, 82.0, 56.7, 56.3, 56.1, 39.7, 32.1, 29.2, 26.0, 18.2, -4.3, -4.5; HRMS Calcd for  $\text{C}_{23}\text{H}_{37}\text{O}_3\text{Si}$  (M+H): 389.2507; Found: 389.2517.

(a) D. Crich, H. Xu and F. Kenig, *J. Org. Chem.*, 2006, **71**, 5016

(b) H. Toya, K. Okano, K. Takasu, M. Ihara, A. Takahashi, H. Tanaka and H. Tokuyama, *Org. Lett.*, 2010, **12**, 5196.

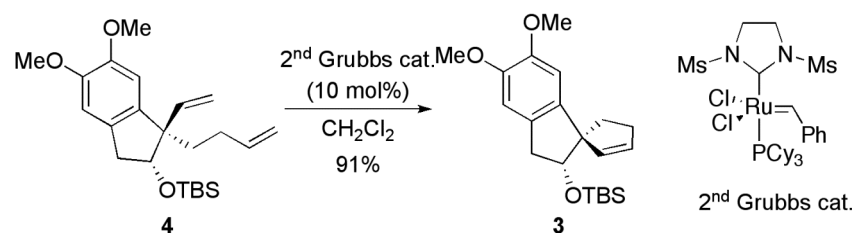

**Tert-butyl((1*R*,2'*R*)-5',6'-dimethoxy-2',3'-dihydrospiro[cyclopent[2]ene-1,1'-indene]-2'-yloxy)dimethylsilane (3).** To a solution of **4** (0.389 g, 1.0 mmol) in  $\text{CH}_2\text{Cl}_2$  (110 mL) was added the second-generation Grubbs catalyst (0.085 g, 0.1 mmol) at rt. The reaction mixture was stirred at rt for 4.5 h, passed through a pad of silica gel, eluted with  $\text{CH}_2\text{Cl}_2$  (50 mL), concentrated, and purified by flash column chromatography (silica gel, eluent: PE/EtOAc = 50/1) to give compound **3** as white solid (0.326 g, 91%). mp. 71-73 °C;  $[\alpha]_D^{20} = -66.9$  ( $c$  0.81,  $\text{CHCl}_3$ ); IR (film): 1499, 1252, 1115  $\text{cm}^{-1}$ ;  $^1\text{H NMR}$  (400 MHz,  $\text{CDCl}_3$ )  $\delta$  6.70 (s, 1H), 6.58 (s, 1H), 6.06-5.98 (m, 1H), 5.55-5.49 (m, 1H), 4.33 (dd,  $J = 8.8, 7.2$  Hz, 1H), 3.85 (s, 6H), 2.93 (dd,  $J = 14.8, 7.2$  Hz, 1H), 2.79 (dd,  $J = 14.4, 8.8$  Hz, 1H), 2.74-2.62 (m, 1H), 2.51-2.35 (m, 2H), 1.53-1.42 (m, 1H), 0.92 (s, 9H), 0.08 (s, 3H), 0.04 (s, 3H);



$^{13}\text{C}$ NMR (100 MHz,  $\text{CDCl}_3$ )  $\delta$  148.7, 148.5, 140.9, 135.8, 133.9, 130.2, 108.0, 106.7, 80.1, 65.0, 56.1, 39.6, 32.7, 30.3, 25.9, 18.2, -4.60, -4.64; HRMS Calcd for  $\text{C}_{21}\text{H}_{32}\text{NaO}_3\text{Si}$  (M+Na): 383.2013; Found: 383.2020.

(a) M. Scholl, T. M. Trnka, J. P. Morgan and R. H. Grubbs, *Tetrahedron Lett.*, 1999, **40**, 2247

(b) B. Biswas, P. K. Sen and R. V. Venkateswaran, *Tetrahedron*, 2007, **63**, 12026

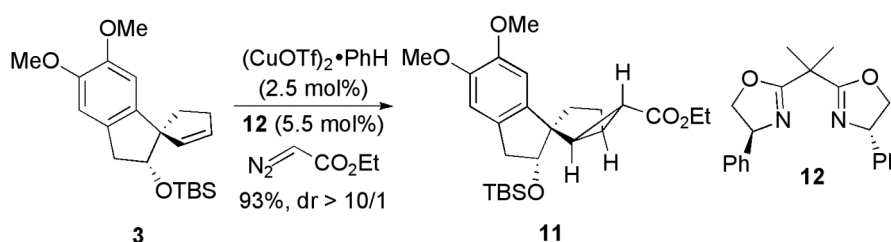

**(1*R*,2*R*,5*R*,6*S*)-ethyl 2'-(*tert*-butyldimethylsilyloxy)-5',6'-dimethoxy-2',3'-dihydrospiro[bicyclo[3.1.0]hexane-2,1'-indene]-6-carboxylate (11).** A solution of  $(\text{CuOTf})_2 \cdot \text{PhH}$  (0.0063 g, 0.0125 mmol) and ligand **12** (0.0092 g, 0.0275 mmol) in  $\text{CH}_2\text{Cl}_2$  (0.5 mL) was stirred at 25 °C for 1 h, followed by the addition of compound **3** (0.1803 g, 0.5 mmol). At this point, a solution of ethyl diazoacetate (containing 15%  $\text{CH}_2\text{Cl}_2$ ) (0.6712 g, 5.0 mmol) in  $\text{CH}_2\text{Cl}_2$  (1 mL) was slowly added via syringe pump over 10 h. The reaction mixture was stirred at 25 °C for another 1 h, passed through a pad of silica gel, eluted with  $\text{CH}_2\text{Cl}_2$  (20 mL), concentrated, and purified by flash column chromatography (silica gel, eluent: PE/EtOAc = 20/1 to 10/1) to give compound **11** as colorless oil (0.2071 g, 93%).  $[\alpha]_{\text{D}}^{20} = -36.8$  ( $c$  0.57,  $\text{CHCl}_3$ ); IR (film): 1724, 1500, 1252, 1178  $\text{cm}^{-1}$ ;  $^1\text{H}$ NMR (400 MHz,  $\text{CDCl}_3$ )  $\delta$  6.94 (s, 1H), 6.67 (s, 1H), 4.38 (t,  $J = 7.2$  Hz, 1H), 4.20-4.06 (m, 2H), 3.87 (s, 3H), 3.83 (s, 3H), 2.95 (dd,  $J = 14.8, 6.8$  Hz, 1H), 2.75 (dd,  $J = 14.8, 8.0$  Hz, 1H), 2.28-2.09 (m, 2H), 2.06-1.92 (m, 2H), 1.87-1.75 (m, 2H), 1.25 (t,  $J = 7.2$  Hz, 3H), 1.09-0.09 (m, 1H), 0.92 (s, 9H), 0.11 (s, 6H);  $^{13}\text{C}$ NMR (100 MHz,  $\text{CDCl}_3$ )  $\delta$  173.6, 148.8, 148.6, 138.3, 131.1, 108.1, 106.2, 81.7, 60.4, 58.7, 56.1, 39.3, 38.0, 28.22, 28.18, 27.2, 26.02, 25.99, 22.0, 18.2, 14.5, -4.5, -4.7; HRMS Calcd for  $\text{C}_{25}\text{H}_{42}\text{NO}_5\text{Si}$  (M+ $\text{NH}_4$ ): 464.2827; Found: 464.2820.

D. A. Evans, K. A. Woerpel, M. M. Hinman and M. M. Faul, *J. Am. Chem. Soc.*, 1991, **113**, 726

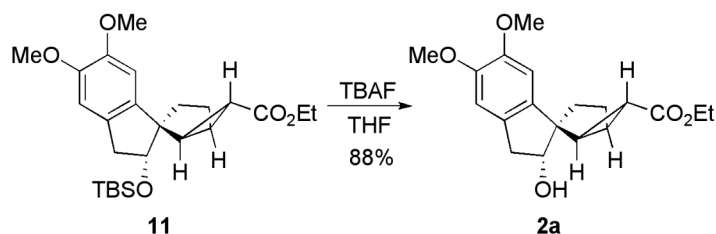

**(1'R,2'R,5R,6S)-ethyl-2'-hydroxy-5',6'-dimethoxy-2',3'-dihydrospiro[bicyclo-3.1.0]hexane-2,1'-indene]-6-carboxylate (2a).** To a solution of **11** (0.622 g, 1.39 mmol) in THF (30 mL) was added TBAF (1 M in THF) (2.8 mL, 2.8 mmol). The reaction mixture was stirred at rt for 3 h, quenched with water (10 mL), extracted with EtOAc (20 mL x 3), washed with brine (10 mL), dried over MgSO<sub>4</sub>, filtered, concentrated, and purified by flash column chromatography (silica gel, eluent: PE/EtOAc = 1/1) to give compound **2a** as colorless oil (0.405 g, 88%).  $[\alpha]_D^{20} = -31.9$  (*c* 1.00, CHCl<sub>3</sub>); IR (film): 3481, 1718, 1499, 1180 cm<sup>-1</sup>; <sup>1</sup>HNMR (400 MHz, CDCl<sub>3</sub>) δ 6.80 (s, 1H), 6.74 (s, 1H), 4.41-4.30 (m, 1H), 4.07 (q, *J* = 7.2 Hz, 2H), 3.87 (s, 3H), 3.83 (s, 3H), 3.18 (dd, *J* = 15.6, 6.0 Hz, 1H), 2.79 (dd, *J* = 15.6, 4.8 Hz, 1H), 2.22-2.02 (m, 3H), 2.01-1.91 (m, 2H), 1.90-1.79 (m, 2H), 1.22 (t, *J* = 7.2 Hz, 3H), 1.31-1.15 (m, 1H); <sup>13</sup>CNMR (100 MHz, CDCl<sub>3</sub>) δ 173.6, 149.0, 148.7, 137.3, 131.5, 108.5, 106.6, 80.4, 60.5, 59.4, 56.3, 56.1, 39.1, 37.4, 27.5, 27.4, 26.5, 21.5, 14.4; HRMS Calcd for C<sub>23</sub>H<sub>37</sub>O<sub>3</sub>Si (M+H): 333.1697; Found: 333.1698.

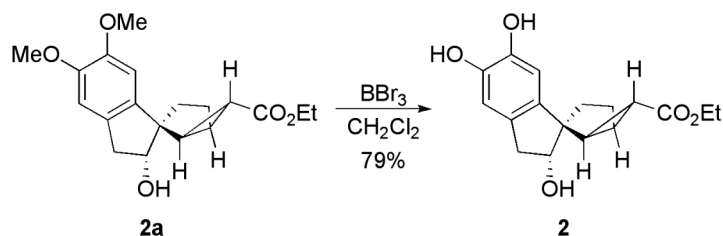

**(1'R,2'R,5R,6S)-ethyl 2',5',6'-trihydroxy-2',3'-dihydrospiro[bicyclo[3.1.0]-hexane-2,1'-indene] -6-carboxylate (2).** To a solution of **2a** (0.405 g, 1.22 mol) in

CH<sub>2</sub>Cl<sub>2</sub> (9 mL) was added a solution of BBr<sub>3</sub> (0.917g, 0.33 mL, 3.7 mmol) in CH<sub>2</sub>Cl<sub>2</sub> (3 mL) at -78 °C under N<sub>2</sub>. The reaction mixture was warmed to rt and stirred at rt for 1 h, poured to ice-water (10 mL), extracted with CHCl<sub>3</sub> (10 mL x 10), dried over Na<sub>2</sub>SO<sub>4</sub>, filtered, concentrated, and purified by flash column chromatography (silica gel, eluent: PE/EtOAc = 1/1) to give compound **2** as white solid (0.293 g, 79 %). mp. 94-96 °C; [ $\alpha$ ]<sub>D</sub><sup>20</sup> = -42.6 (*c* 0.74, CHCl<sub>3</sub>); IR (film): 3372, 1694, 1307, 1276 cm<sup>-1</sup>; <sup>1</sup>HNMR (400 MHz, CDCl<sub>3</sub>)  $\delta$  6.69 (s, 1H), 6.64 (s, 1H), 6.38 (br, 1H), 6.19 (br, 1H), 4.31-4.19 (m, 1H), 4.17-3.95 (m, 2H), 3.19-3.04 (m, 1H), 2.76-2.64 (m, 1H), 2.57 (br, 1H), 2.15-1.86 (m, 4H), 1.85-1.74 (m, 2H), 1.22 (t, *J* = 7.2 Hz, 3H), 1.09-1.07 (m, 1H); <sup>13</sup>CNMR (100 MHz, CDCl<sub>3</sub>)  $\delta$  174.5, 143.7, 143.3, 137.4, 131.8, 112.3, 110.4, 80.4, 61.0, 59.6, 39.1, 37.3, 28.1, 27.4, 26.1, 21.6, 14.4; HRMS Calcd for C<sub>17</sub>H<sub>21</sub>O<sub>5</sub> (M+H): 305.1384; Found: 305.1384.

(a) C.-C. Lin, T.-M. Teng, C.-C. Tsai, H.-Y. Liao and R.-S. Liu, *J. Am. Chem. Soc.*, 2008, **130**, 16417

(b) C. Pan, X. Zeng, Y. Guan, X. Jiang, L. Li and H. Zhang, *Synlett*, 2011, 425

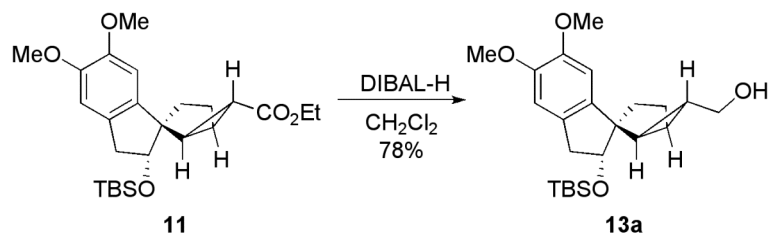

**((1'R,2'R,5R,6S)-2'-(tert-butyldimethylsilyloxy)-5',6'-dimethoxy-2',3'-dihydrospiro[bicyclo- [3.1.0]hexane-2,1'-indene]-6-yl)methanol (13a).** To a solution of **11** (0.495 g, 1.1 mmol) in CH<sub>2</sub>Cl<sub>2</sub> (11 mL) was added DIBAL-H (1 M in hexane) (2.8 mL, 2.8 mmol) at -78 °C under N<sub>2</sub>. Upon stirring at -78 °C for 15 min and at 0 °C for 1 h, the reaction mixture was quenched with MeOH (0.5 mL) and saturated sodium potassium tartrate (20 mL), stirred at rt for 0.5 h, extracted with CH<sub>2</sub>Cl<sub>2</sub> (10 mL x 3), washed with brine (10 mL), dried over Na<sub>2</sub>SO<sub>4</sub>, filtered, concentrated, and purified by flash column chromatography (silica gel, eluent: PE/EtOAc = 2/1) to give compound **13a** as colorless oil (0.346 g, 78%). [ $\alpha$ ]<sub>D</sub><sup>20</sup> = -52.8 (*c* 0.48, CHCl<sub>3</sub>);

IR (film): 3497, 1498, 1252, 1104  $\text{cm}^{-1}$ ;  $^1\text{H}$ NMR (400 MHz,  $\text{CDCl}_3$ )  $\delta$  7.02 (s, 1H), 6.66 (s, 1H), 4.34 (t,  $J = 7.2$  Hz, 1H), 3.85 (s, 3H), 3.82 (s, 3H), 3.67-3.55 (m, 1H), 3.46-3.32 (m, 1H), 2.92 (dd,  $J = 14.8, 6.8$  Hz, 1H), 2.74 (dd,  $J = 14.8, 8.0$  Hz, 1H), 2.24-2.12 (m, 1H), 2.11-2.00 (m, 1H), 1.80-1.66 (m, 2H), 1.54-1.43 (m, 1H), 1.35-1.25 (m, 1H), 1.18-0.99 (m, 2H), 0.92 (s, 9H), 0.11 (s, 6H);  $^{13}\text{C}$ NMR (100 MHz,  $\text{CDCl}_3$ )  $\delta$  148.6, 148.5, 139.5, 130.9, 108.0, 106.3, 82.2, 66.0, 58.0, 56.2, 56.1, 39.2, 32.8, 29.2, 28.1, 26.0, 22.6, 22.0, 18.2, -4.6, -4.7; HRMS Calcd for  $\text{C}_{23}\text{H}_{40}\text{NO}_4\text{Si}$  ( $\text{M}+\text{NH}_4$ ): 422.2721; Found: 422.2718.

(a) D. L. J. Clive, M. Yu and M. Sannigrahi, *J. Org. Chem.*, 2004, **69**, 4116

(b) K. Okura, S. Matsuoka, R. Goto and M. Inoue, *Angew. Chem., Int. Ed.*, 2010, **49**, 329.

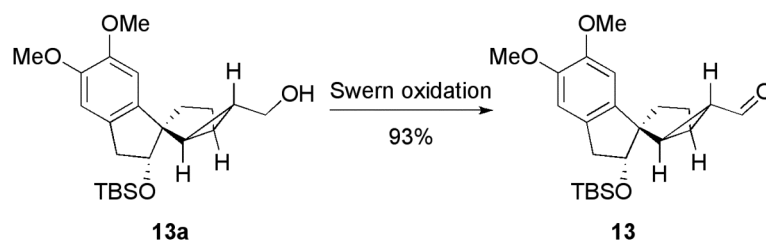

**(1'R,2'R,5R,6S)-2'-(tert-butyldimethylsilyloxy)-5',6'-dimethoxy-2',3'-dihydro-spiro[bicycle- [3.1.0]hexane-2,1'-indene]-6-carbaldehyde (13).** To a solution of  $(\text{COCl})_2$  (0.123 g, 0.095 mL, 0.97 mmol) in  $\text{CH}_2\text{Cl}_2$  (8 mL) was slowly added DMSO (0.126 g, 0.115 mL, 1.62 mmol) at  $-78$  °C under  $\text{N}_2$ . After the reaction mixture was stirred at  $-78$  °C for 15 min, a solution of **13a** (0.327 g, 0.81 mmol) in  $\text{CH}_2\text{Cl}_2$  (1 mL) was added. The resulting mixture was stirred at  $-78$  °C for another 45 min. Upon addition of  $\text{Et}_3\text{N}$  (0.328 g, 0.451 mL, 3.24 mmol), the reaction mixture was warmed to rt over 2 h, quenched with water (5 mL), extracted with  $\text{CH}_2\text{Cl}_2$  (10 mL x 3), washed with brine (5 mL), dried over  $\text{Na}_2\text{SO}_4$ , filtered, and concentrated, and purified by flash column chromatography (silica gel, eluent: PE/EtOAc = 5/1) to give compound **13** as white solid (0.304 g, 93%). mp. 91-93 °C;  $[\alpha]_{\text{D}}^{20} = -70.3$  ( $c$  0.76,  $\text{CHCl}_3$ ); IR (film): 1706, 1499, 1252, 1107  $\text{cm}^{-1}$ ;  $^1\text{H}$ NMR (400 MHz,  $\text{CDCl}_3$ )  $\delta$  9.12 (d,  $J = 4.8$  Hz, 1H), 6.83 (s, 1H), 6.68 (s, 1H), 4.11 (t,  $J = 7.2$  Hz, 1H), 3.85 (s, 3H), 3.83 (s,

3H), 2.96 (dd,  $J = 14.8, 6.8$  Hz, 1H), 2.76 (dd,  $J = 14.8, 8.0$  Hz, 1H), 2.30-2.15 (m, 3H), 2.14-2.03 (m, 1H), 1.95-1.92 (m, 1H), 1.90-1.79 (m, 1H), 1.01-1.12 (m, 1H), 0.93 (s, 9H), 0.12 (s, 6H);  $^{13}\text{C}$ NMR (100 MHz,  $\text{CDCl}_3$ )  $\delta$  199.9, 149.0, 148.8, 137.6, 131.1, 108.2, 106.2, 81.9, 58.7, 56.4, 56.2, 39.2, 37.2, 32.5, 28.14, 28.09, 27.3, 26.0, 18.3, -4.4, -4.6; HRMS Calcd for  $\text{C}_{23}\text{H}_{34}\text{O}_4\text{Si}$  ( $\text{M}^+$ ): 402.2226; Found: 402.2221.

S. F. Martin, J. M. Humphrey, A. Ali and M. C. Hillier, *J. Am. Chem. Soc.*, 1999, **121**, 866.

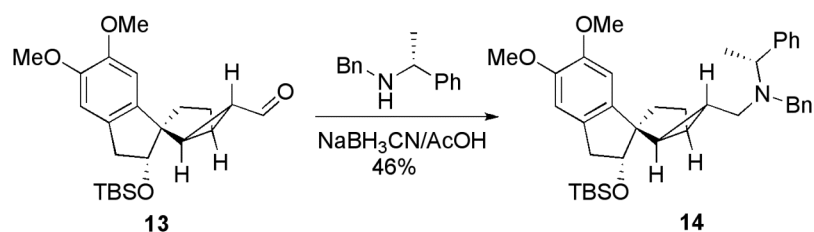

**(1R)-N-benzyl-N-(((1'R,2'R,5R,6S)-2'-(tert-butyldimethylsilyloxy)-5',6'-dimethoxy-2',3'-dihydrospiro[bicyclo[3.1.0]hexane-2,1'-indene]-6-yl)methyl)-1-phenylethylamine (14).** To a solution of **13** (0.271 g, 0.67 mmol), (R)-(+)-N-benzyl-1-phenylethylamine (0.171 g, 0.17 mL, 0.81 mmol), AcOH (0.089 g, 0.86 mL, 1.48 mmol) in MeOH (11 mL) was added NaBH<sub>3</sub>CN (0.0758 g, 1.20 mmol) under N<sub>2</sub>. The reaction mixture was stirred at rt overnight, quenched with aqueous NaOH (5 mL, 1M), concentrated, extracted with EtOAc (10 mL x 3), washed with brine (5 mL), dried over MgSO<sub>4</sub>, filtered, concentrated, and purified by flash column chromatography (silica gel, eluent: PE/EtOAc = 15/1) to give compound **14** as colorless oil (0.185 g, 46%).  $[\alpha]_{\text{D}}^{20} = -61.0$  ( $c$  0.92,  $\text{CHCl}_3$ ); IR (film) 1496, 1251, 1104  $\text{cm}^{-1}$ ;  $^1\text{H}$ NMR (400 MHz,  $\text{CDCl}_3$ )  $\delta$  7.44-7.13 (m, 10H), 6.74 (s, 1H), 6.67 (s, 1H), 4.24 (t,  $J = 6.8$  Hz, 1H), 4.13-4.03 (m, 1H), 3.81 (s, 3H), 3.72 (d,  $J = 14.4$  Hz, 1H), 3.61 (s, 3H), 3.50 (d,  $J = 14.4$  Hz, 1H), 2.94 (dd,  $J = 14.8, 6.4$  Hz, 1H), 2.71 (dd,  $J = 14.8, 6.8$  Hz, 1H), 2.59-2.49 (m, 1H), 2.28-2.17 (m, 1H), 2.16-2.05 (m, 1H), 2.02-1.90 (m, 1H), 1.72-1.60 (m, 1H), 1.35 (d,  $J = 6.8$  Hz, 3H), 1.21-1.02 (m, 3H), 0.90 (s, 9H), 0.86-0.79 (m, 1H), 0.08 (s, 3H), 0.07 (s, 3H);  $^{13}\text{C}$ NMR (100 MHz,

CDCl<sub>3</sub>)  $\delta$  148.5, 144.7, 141.2, 139.7, 131.1, 128.7, 128.3, 128.1, 127.9, 126.73, 126.66, 108.1, 106.4, 82.1, 58.9, 57.4, 56.2, 56.1, 54.4, 52.2, 39.5, 32.7, 28.8, 28.2, 26.1, 24.6, 18.5, 18.4, 13.6, -4.5, -4.6; HRMS Calcd for C<sub>38</sub>H<sub>52</sub>NO<sub>3</sub>Si (M+H): 598.3711; Found: 598.3718.

N. T. Hatzenbuehler, R. Baudy, D. A. Evrard, A. Failli, B. L. Harrison, S. Lenicek, R. E. Mewshaw, A. Saab, U. Shah, J. Sze, M. Zhang, D. Zhou, M. Chlenov, M. Kagan, J. Golembieski, G. Hornby, M. Lai, D. L. Smith, K. M. Sullivan, L. E. Schechter and T. H. Andree, *J. Med. Chem.*, 2008, **51**, 6980.

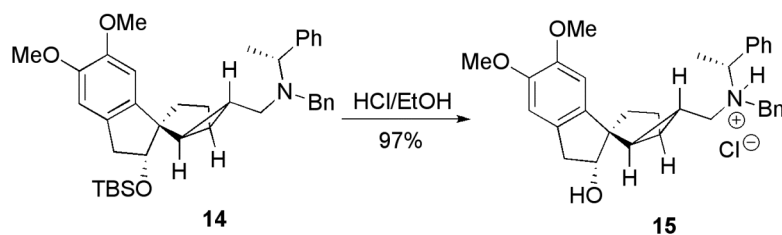

**(1*R*)-*N*-benzyl-*N*-(((1'*R*,2'*R*,5*R*,6*S*)-2'-hydroxy-5',6'-dimethoxy-2',3'-dihydro spiro[bicyclo-[3.1.0]hexane-2,1'-indene]-6-yl)methyl)-1-phenylethanaminium chloride (15).** To a solution of **14** (0.0794 g, 0.13 mmol) in EtOAc (20 mL) was added a solution of HCl in EtOH (5 mL). The reaction mixture was stirred at rt for 0.5 h, concentrated, and washed with EtOAc (20 mL) to give compound **15** as white solid (0.065 g, 97%), which was crystallized from MeOH/Et<sub>2</sub>O/EtOAc for the X-ray structure. HRMS Calcd for C<sub>32</sub>H<sub>38</sub>NO<sub>3</sub> (M-Cl): 484.2846; Found: 484.2839.

## The X-ray Structure of Compound 15

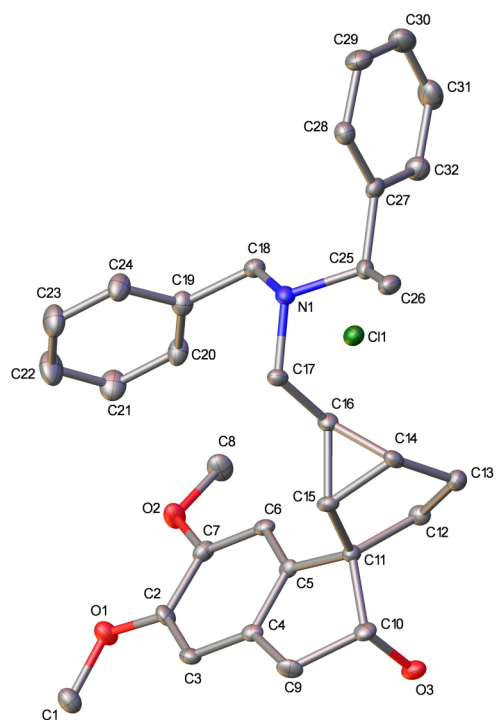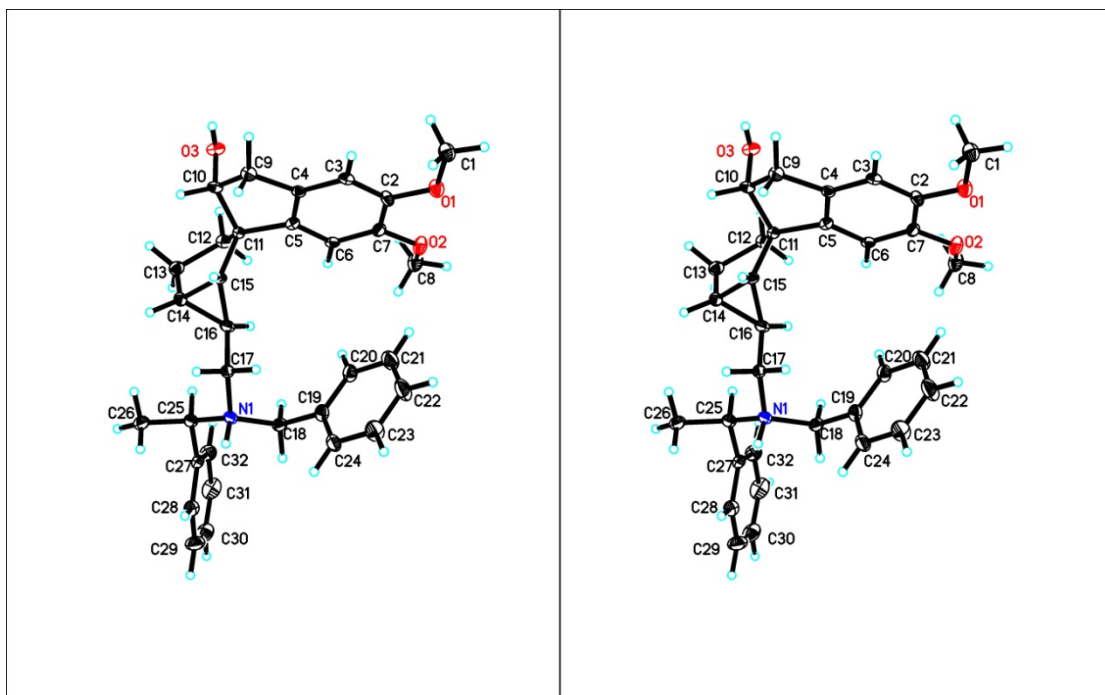

Table 1. Crystal data and structure refinement for a.

|                                   |                                                                                                                   |
|-----------------------------------|-------------------------------------------------------------------------------------------------------------------|
| Identification code               | a                                                                                                                 |
| Empirical formula                 | C <sub>33</sub> H <sub>42</sub> Cl N O <sub>4</sub>                                                               |
| Formula weight                    | 552.13                                                                                                            |
| Temperature                       | 173(2) K                                                                                                          |
| Wavelength                        | 0.71073 Å                                                                                                         |
| Crystal system, space group       | Tetragonal, P4(1)2(1)2                                                                                            |
| Unit cell dimensions              | a = 12.3304(17) Å    alpha = 90 deg.<br>b = 12.3304(17) Å    beta = 90 deg.<br>c = 38.821(8) Å    gamma = 90 deg. |
| Volume                            | 5902.3(17) Å <sup>3</sup>                                                                                         |
| Z, Calculated density             | 8, 1.243 Mg/m <sup>3</sup>                                                                                        |
| Absorption coefficient            | 0.167 mm <sup>-1</sup>                                                                                            |
| F(000)                            | 2368                                                                                                              |
| Crystal size                      | 0.25 x 0.19 x 0.05 mm                                                                                             |
| Theta range for data collection   | 1.73 to 25.00 deg.                                                                                                |
| Limiting indices                  | -14<=h<=14, -14<=k<=14, -45<=l<=45                                                                                |
| Reflections collected / unique    | 34943 / 5205 [R(int) = 0.0990]                                                                                    |
| Completeness to theta = 25.00     | 99.8 %                                                                                                            |
| Absorption correction             | Semi-empirical from equivalents                                                                                   |
| Max. and min. transmission        | 1.0000 and 0.6720                                                                                                 |
| Refinement method                 | Full-matrix least-squares on F <sup>2</sup>                                                                       |
| Data / restraints / parameters    | 5205 / 0 / 356                                                                                                    |
| Goodness-of-fit on F <sup>2</sup> | 1.321                                                                                                             |
| Final R indices [I>2sigma(I)]     | R1 = 0.0906, wR2 = 0.1577                                                                                         |
| R indices (all data)              | R1 = 0.0932, wR2 = 0.1587                                                                                         |
| Absolute structure parameter      | 0.06(13)                                                                                                          |
| Largest diff. peak and hole       | 0.227 and -0.224 e.Å <sup>-3</sup>                                                                                |



Table 2. Atomic coordinates ( $\times 10^4$ ) and equivalent isotropic displacement parameters ( $\text{\AA}^2 \times 10^3$ ) for a.

$U(\text{eq})$  is defined as one third of the trace of the orthogonalized  $U_{ij}$  tensor.

|        | x        | y       | z       | U(eq) |
|--------|----------|---------|---------|-------|
| Cl (1) | 6941(1)  | 4424(1) | 3727(1) | 27(1) |
| O(1)   | 9424(3)  | 7082(3) | 2328(1) | 33(1) |
| O(2)   | 7954(3)  | 6098(3) | 2680(1) | 33(1) |
| O(3)   | 10573(3) | 8408(3) | 3861(1) | 31(1) |
| O(4)   | 3693(4)  | 5540(4) | 3906(1) | 57(1) |
| N(1)   | 10193(3) | 2376(3) | 3893(1) | 24(1) |
| C(1)   | 10196(4) | 7685(5) | 2131(1) | 35(1) |
| C(2)   | 9651(4)  | 6960(4) | 2671(1) | 26(1) |
| C(3)   | 10588(4) | 7333(4) | 2833(1) | 25(1) |
| C(4)   | 10719(4) | 7170(4) | 3186(1) | 21(1) |
| C(5)   | 9937(4)  | 6619(4) | 3374(1) | 20(1) |
| C(6)   | 8994(4)  | 6243(4) | 3215(1) | 23(1) |
| C(7)   | 8843(4)  | 6429(4) | 2865(1) | 27(1) |
| C(8)   | 6998(4)  | 5888(5) | 2860(1) | 39(1) |
| C(9)   | 11643(4) | 7522(4) | 3414(1) | 27(1) |
| C(10)  | 11147(4) | 7431(4) | 3775(1) | 27(1) |
| C(11)  | 10308(4) | 6499(4) | 3748(1) | 21(1) |
| C(12)  | 9450(4)  | 6490(4) | 4030(1) | 26(1) |
| C(13)  | 9982(4)  | 5914(4) | 4337(1) | 29(1) |
| C(14)  | 10723(4) | 5083(4) | 4173(1) | 24(1) |
| C(15)  | 10941(4) | 5430(4) | 3807(1) | 23(1) |
| C(16)  | 10285(4) | 4424(4) | 3874(1) | 26(1) |
| C(17)  | 10834(4) | 3361(4) | 3789(1) | 23(1) |
| C(18)  | 9188(4)  | 2210(4) | 3670(1) | 27(1) |
| C(19)  | 9402(4)  | 2389(4) | 3291(1) | 30(1) |
| C(20)  | 8959(4)  | 3262(4) | 3126(1) | 33(1) |
| C(21)  | 9145(5)  | 3453(5) | 2779(2) | 45(2) |
| C(22)  | 9765(6)  | 2734(5) | 2599(2) | 53(2) |
| C(23)  | 10226(5) | 1862(5) | 2758(1) | 47(2) |
| C(24)  | 10047(5) | 1669(5) | 3105(1) | 39(1) |
| C(25)  | 9890(4)  | 2394(4) | 4280(1) | 25(1) |
| C(26)  | 10924(5) | 2353(4) | 4498(1) | 34(1) |
| C(27)  | 9123(4)  | 1488(4) | 4378(1) | 27(1) |
| C(28)  | 9468(5)  | 412(4)  | 4380(1) | 32(1) |
| C(29)  | 8774(5)  | -389(5) | 4492(2) | 47(2) |

|       |         |         |         |       |
|-------|---------|---------|---------|-------|
| C(30) | 7734(5) | -146(5) | 4599(2) | 49(2) |
| C(31) | 7389(5) | 907(6)  | 4589(2) | 52(2) |
| C(32) | 8081(5) | 1728(5) | 4481(1) | 37(1) |
| C(33) | 3624(5) | 5756(5) | 4262(2) | 49(2) |

---

Table 3. Bond lengths [Å] and angles [deg] for a.

---

|              |          |
|--------------|----------|
| O(1)–C(2)    | 1.368(5) |
| O(1)–C(1)    | 1.429(6) |
| O(2)–C(7)    | 1.373(6) |
| O(2)–C(8)    | 1.397(6) |
| O(3)–C(10)   | 1.437(6) |
| O(3)–H(3)    | 0.8401   |
| O(4)–C(33)   | 1.411(7) |
| O(4)–H(4)    | 0.8402   |
| N(1)–C(17)   | 1.505(6) |
| N(1)–C(18)   | 1.526(6) |
| N(1)–C(25)   | 1.547(6) |
| N(1)–H(1)    | 0.9300   |
| C(1)–H(1C)   | 0.9800   |
| C(1)–H(1A)   | 0.9800   |
| C(1)–H(1B)   | 0.9800   |
| C(2)–C(3)    | 1.393(7) |
| C(2)–C(7)    | 1.411(7) |
| C(3)–C(4)    | 1.394(6) |
| C(3)–H(3A)   | 0.9500   |
| C(4)–C(5)    | 1.387(6) |
| C(4)–C(9)    | 1.508(7) |
| C(5)–C(6)    | 1.395(6) |
| C(5)–C(11)   | 1.530(7) |
| C(6)–C(7)    | 1.390(7) |
| C(6)–H(6)    | 0.9500   |
| C(8)–H(8C)   | 0.9800   |
| C(8)–H(8B)   | 0.9800   |
| C(8)–H(8A)   | 0.9800   |
| C(9)–C(10)   | 1.531(7) |
| C(9)–H(9B)   | 0.9900   |
| C(9)–H(9A)   | 0.9900   |
| C(10)–C(11)  | 1.549(7) |
| C(10)–H(10)  | 1.0000   |
| C(11)–C(12)  | 1.523(7) |
| C(11)–C(15)  | 1.550(6) |
| C(12)–C(13)  | 1.533(7) |
| C(12)–H(12A) | 0.9900   |
| C(12)–H(12B) | 0.9900   |
| C(13)–C(14)  | 1.512(7) |
| C(13)–H(13B) | 0.9900   |
| C(13)–H(13A) | 0.9900   |

|               |            |
|---------------|------------|
| C (14)–C(15)  | 1. 508 (6) |
| C (14)–C(16)  | 1. 517 (7) |
| C (14)–H(14)  | 1. 0000    |
| C (15)–C(16)  | 1. 503 (6) |
| C (15)–H(15)  | 1. 0000    |
| C (16)–C(17)  | 1. 512 (6) |
| C (16)–H(16)  | 1. 0000    |
| C (17)–H(17A) | 0. 9900    |
| C (17)–H(17B) | 0. 9900    |
| C (18)–C(19)  | 1. 510 (7) |
| C (18)–H(18A) | 0. 9900    |
| C (18)–H(18B) | 0. 9900    |
| C (19)–C(20)  | 1. 368 (7) |
| C (19)–C(24)  | 1. 394 (7) |
| C (20)–C(21)  | 1. 384 (8) |
| C (20)–H(20)  | 0. 9500    |
| C (21)–C(22)  | 1. 363 (8) |
| C (21)–H(21)  | 0. 9500    |
| C (22)–C(23)  | 1. 364 (8) |
| C (22)–H(22)  | 0. 9500    |
| C (23)–C(24)  | 1. 385 (7) |
| C (23)–H(23)  | 0. 9500    |
| C (24)–H(24)  | 0. 9500    |
| C (25)–C(27)  | 1. 513 (7) |
| C (25)–C(26)  | 1. 532 (7) |
| C (25)–H(25)  | 1. 0000    |
| C (26)–H(26A) | 0. 9800    |
| C (26)–H(26C) | 0. 9800    |
| C (26)–H(26B) | 0. 9800    |
| C (27)–C(32)  | 1. 378 (7) |
| C (27)–C(28)  | 1. 394 (7) |
| C (28)–C(29)  | 1. 378 (8) |
| C (28)–H(28)  | 0. 9500    |
| C (29)–C(30)  | 1. 381 (9) |
| C (29)–H(29)  | 0. 9500    |
| C (30)–C(31)  | 1. 368 (9) |
| C (30)–H(30)  | 0. 9500    |
| C (31)–C(32)  | 1. 389 (8) |
| C (31)–H(31)  | 0. 9500    |
| C (32)–H(32)  | 0. 9500    |
| C (33)–H(33A) | 0. 9800    |
| C (33)–H(33B) | 0. 9800    |
| C (33)–H(33C) | 0. 9800    |

|                     |            |
|---------------------|------------|
| C (2)–O (1)–C (1)   | 116. 2 (4) |
| C (7)–O (2)–C (8)   | 117. 7 (4) |
| C (10)–O (3)–H (3)  | 94. 0      |
| C (33)–O (4)–H (4)  | 111. 6     |
| C (17)–N (1)–C (18) | 112. 4 (3) |
| C (17)–N (1)–C (25) | 112. 1 (4) |
| C (18)–N (1)–C (25) | 111. 0 (4) |
| C (17)–N (1)–H (1)  | 107. 0     |
| C (18)–N (1)–H (1)  | 107. 0     |
| C (25)–N (1)–H (1)  | 107. 0     |
| O (1)–C (1)–H (1C)  | 109. 5     |
| O (1)–C (1)–H (1A)  | 109. 5     |
| H (1C)–C (1)–H (1A) | 109. 5     |
| O (1)–C (1)–H (1B)  | 109. 5     |
| H (1C)–C (1)–H (1B) | 109. 5     |
| H (1A)–C (1)–H (1B) | 109. 5     |
| O (1)–C (2)–C (3)   | 124. 8 (4) |
| O (1)–C (2)–C (7)   | 115. 3 (4) |
| C (3)–C (2)–C (7)   | 119. 9 (4) |
| C (2)–C (3)–C (4)   | 119. 4 (5) |
| C (2)–C (3)–H (3A)  | 120. 3     |
| C (4)–C (3)–H (3A)  | 120. 3     |
| C (5)–C (4)–C (3)   | 120. 5 (5) |
| C (5)–C (4)–C (9)   | 110. 9 (4) |
| C (3)–C (4)–C (9)   | 128. 6 (4) |
| C (4)–C (5)–C (6)   | 120. 7 (4) |
| C (4)–C (5)–C (11)  | 109. 8 (4) |
| C (6)–C (5)–C (11)  | 129. 4 (4) |
| C (7)–C (6)–C (5)   | 119. 1 (5) |
| C (7)–C (6)–H (6)   | 120. 4     |
| C (5)–C (6)–H (6)   | 120. 4     |
| O (2)–C (7)–C (6)   | 124. 8 (5) |
| O (2)–C (7)–C (2)   | 114. 9 (4) |
| C (6)–C (7)–C (2)   | 120. 3 (5) |
| O (2)–C (8)–H (8C)  | 109. 5     |
| O (2)–C (8)–H (8B)  | 109. 5     |
| H (8C)–C (8)–H (8B) | 109. 5     |
| O (2)–C (8)–H (8A)  | 109. 5     |
| H (8C)–C (8)–H (8A) | 109. 5     |
| H (8B)–C (8)–H (8A) | 109. 5     |
| C (4)–C (9)–C (10)  | 102. 4 (4) |
| C (4)–C (9)–H (9B)  | 111. 3     |
| C (10)–C (9)–H (9B) | 111. 3     |
| C (4)–C (9)–H (9A)  | 111. 3     |

|                     |          |
|---------------------|----------|
| C(10)-C(9)-H(9A)    | 111.3    |
| H(9B)-C(9)-H(9A)    | 109.2    |
| O(3)-C(10)-C(9)     | 110.4(4) |
| O(3)-C(10)-C(11)    | 108.0(4) |
| C(9)-C(10)-C(11)    | 105.0(4) |
| O(3)-C(10)-H(10)    | 111.1    |
| C(9)-C(10)-H(10)    | 111.1    |
| C(11)-C(10)-H(10)   | 111.1    |
| C(12)-C(11)-C(5)    | 118.5(4) |
| C(12)-C(11)-C(10)   | 114.9(4) |
| C(5)-C(11)-C(10)    | 101.1(4) |
| C(12)-C(11)-C(15)   | 103.7(4) |
| C(5)-C(11)-C(15)    | 112.0(4) |
| C(10)-C(11)-C(15)   | 106.5(4) |
| C(11)-C(12)-C(13)   | 105.4(4) |
| C(11)-C(12)-H(12A)  | 110.7    |
| C(13)-C(12)-H(12A)  | 110.7    |
| C(11)-C(12)-H(12B)  | 110.7    |
| C(13)-C(12)-H(12B)  | 110.7    |
| H(12A)-C(12)-H(12B) | 108.8    |
| C(14)-C(13)-C(12)   | 104.3(4) |
| C(14)-C(13)-H(13B)  | 110.9    |
| C(12)-C(13)-H(13B)  | 110.9    |
| C(14)-C(13)-H(13A)  | 110.9    |
| C(12)-C(13)-H(13A)  | 110.9    |
| H(13B)-C(13)-H(13A) | 108.9    |
| C(15)-C(14)-C(13)   | 108.1(4) |
| C(15)-C(14)-C(16)   | 59.6(3)  |
| C(13)-C(14)-C(16)   | 117.9(4) |
| C(15)-C(14)-H(14)   | 118.8    |
| C(13)-C(14)-H(14)   | 118.8    |
| C(16)-C(14)-H(14)   | 118.8    |
| C(16)-C(15)-C(14)   | 60.5(3)  |
| C(16)-C(15)-C(11)   | 117.1(4) |
| C(14)-C(15)-C(11)   | 107.0(4) |
| C(16)-C(15)-H(15)   | 119.2    |
| C(14)-C(15)-H(15)   | 119.2    |
| C(11)-C(15)-H(15)   | 119.2    |
| C(15)-C(16)-C(17)   | 115.9(4) |
| C(15)-C(16)-C(14)   | 59.9(3)  |
| C(17)-C(16)-C(14)   | 118.3(4) |
| C(15)-C(16)-H(16)   | 116.9    |
| C(17)-C(16)-H(16)   | 116.9    |
| C(14)-C(16)-H(16)   | 116.9    |

|                     |          |
|---------------------|----------|
| N(1)-C(17)-C(16)    | 113.9(4) |
| N(1)-C(17)-H(17A)   | 108.8    |
| C(16)-C(17)-H(17A)  | 108.8    |
| N(1)-C(17)-H(17B)   | 108.8    |
| C(16)-C(17)-H(17B)  | 108.8    |
| H(17A)-C(17)-H(17B) | 107.7    |
| C(19)-C(18)-N(1)    | 113.0(4) |
| C(19)-C(18)-H(18A)  | 109.0    |
| N(1)-C(18)-H(18A)   | 109.0    |
| C(19)-C(18)-H(18B)  | 109.0    |
| N(1)-C(18)-H(18B)   | 109.0    |
| H(18A)-C(18)-H(18B) | 107.8    |
| C(20)-C(19)-C(24)   | 119.0(5) |
| C(20)-C(19)-C(18)   | 120.2(5) |
| C(24)-C(19)-C(18)   | 120.8(5) |
| C(19)-C(20)-C(21)   | 121.6(5) |
| C(19)-C(20)-H(20)   | 119.2    |
| C(21)-C(20)-H(20)   | 119.2    |
| C(22)-C(21)-C(20)   | 118.7(5) |
| C(22)-C(21)-H(21)   | 120.6    |
| C(20)-C(21)-H(21)   | 120.6    |
| C(21)-C(22)-C(23)   | 121.0(5) |
| C(21)-C(22)-H(22)   | 119.5    |
| C(23)-C(22)-H(22)   | 119.5    |
| C(22)-C(23)-C(24)   | 120.5(5) |
| C(22)-C(23)-H(23)   | 119.8    |
| C(24)-C(23)-H(23)   | 119.8    |
| C(23)-C(24)-C(19)   | 119.1(5) |
| C(23)-C(24)-H(24)   | 120.4    |
| C(19)-C(24)-H(24)   | 120.4    |
| C(27)-C(25)-C(26)   | 110.9(4) |
| C(27)-C(25)-N(1)    | 112.6(4) |
| C(26)-C(25)-N(1)    | 109.7(4) |
| C(27)-C(25)-H(25)   | 107.8    |
| C(26)-C(25)-H(25)   | 107.8    |
| N(1)-C(25)-H(25)    | 107.8    |
| C(25)-C(26)-H(26A)  | 109.5    |
| C(25)-C(26)-H(26C)  | 109.5    |
| H(26A)-C(26)-H(26C) | 109.5    |
| C(25)-C(26)-H(26B)  | 109.5    |
| H(26A)-C(26)-H(26B) | 109.5    |
| H(26C)-C(26)-H(26B) | 109.5    |
| C(32)-C(27)-C(28)   | 119.2(5) |
| C(32)-C(27)-C(25)   | 119.9(5) |

|                        |            |
|------------------------|------------|
| C (28)–C (27)–C (25)   | 120. 9 (5) |
| C (29)–C (28)–C (27)   | 119. 6 (5) |
| C (29)–C (28)–H (28)   | 120. 2     |
| C (27)–C (28)–H (28)   | 120. 2     |
| C (28)–C (29)–C (30)   | 121. 2 (6) |
| C (28)–C (29)–H (29)   | 119. 4     |
| C (30)–C (29)–H (29)   | 119. 4     |
| C (31)–C (30)–C (29)   | 119. 1 (6) |
| C (31)–C (30)–H (30)   | 120. 5     |
| C (29)–C (30)–H (30)   | 120. 5     |
| C (30)–C (31)–C (32)   | 120. 6 (6) |
| C (30)–C (31)–H (31)   | 119. 7     |
| C (32)–C (31)–H (31)   | 119. 7     |
| C (27)–C (32)–C (31)   | 120. 3 (6) |
| C (27)–C (32)–H (32)   | 119. 8     |
| C (31)–C (32)–H (32)   | 119. 8     |
| O (4)–C (33)–H (33A)   | 109. 5     |
| O (4)–C (33)–H (33B)   | 109. 5     |
| H (33A)–C (33)–H (33B) | 109. 5     |
| O (4)–C (33)–H (33C)   | 109. 5     |
| H (33A)–C (33)–H (33C) | 109. 5     |
| H (33B)–C (33)–H (33C) | 109. 5     |

---

Symmetry transformations used to generate equivalent atoms:



Table 4. Anisotropic displacement parameters ( $\text{\AA}^2 \times 10^3$ ) for a.

The anisotropic displacement factor exponent takes the form:

$$-2 \pi^2 [ h^2 a^*^2 U_{11} + \dots + 2 h k a^* b^* U_{12} ]$$

|       | U11   | U22   | U33   | U23    | U13   | U12    |
|-------|-------|-------|-------|--------|-------|--------|
| C1(1) | 29(1) | 23(1) | 28(1) | -2(1)  | 1(1)  | 0(1)   |
| O(1)  | 29(2) | 42(2) | 28(2) | 5(2)   | 0(2)  | -5(2)  |
| O(2)  | 23(2) | 49(2) | 27(2) | -4(2)  | -2(2) | -9(2)  |
| O(3)  | 30(2) | 21(2) | 44(2) | -1(2)  | 5(2)  | -2(2)  |
| O(4)  | 47(3) | 70(3) | 55(3) | -12(2) | 13(2) | -18(2) |
| N(1)  | 28(2) | 20(2) | 23(2) | 3(2)   | 1(2)  | 2(2)   |
| C(1)  | 32(3) | 44(4) | 30(3) | 5(3)   | 3(2)  | -1(2)  |
| C(2)  | 30(3) | 31(3) | 18(2) | 7(2)   | 1(2)  | 0(2)   |
| C(3)  | 27(3) | 19(2) | 28(3) | 5(2)   | 3(2)  | -2(2)  |
| C(4)  | 18(2) | 16(2) | 29(3) | 3(2)   | -2(2) | 3(2)   |
| C(5)  | 15(2) | 19(3) | 27(3) | -4(2)  | 2(2)  | 2(2)   |
| C(6)  | 23(3) | 15(2) | 30(3) | 1(2)   | 0(2)  | 0(2)   |
| C(7)  | 28(3) | 23(3) | 30(3) | -4(2)  | -7(2) | 1(2)   |
| C(8)  | 24(3) | 54(4) | 38(3) | -2(3)  | -5(3) | -9(3)  |
| C(9)  | 12(2) | 30(3) | 39(3) | 7(2)   | -2(2) | -5(2)  |
| C(10) | 33(3) | 16(2) | 32(3) | 2(2)   | -2(2) | 3(2)   |
| C(11) | 25(3) | 18(2) | 20(2) | 1(2)   | -2(2) | -1(2)  |
| C(12) | 22(3) | 24(3) | 31(3) | 1(2)   | 2(2)  | 1(2)   |
| C(13) | 34(3) | 26(3) | 28(3) | -2(2)  | 3(2)  | -2(2)  |
| C(14) | 26(3) | 27(3) | 20(2) | 6(2)   | 0(2)  | -7(2)  |
| C(15) | 20(2) | 17(2) | 32(3) | 2(2)   | 1(2)  | -4(2)  |
| C(16) | 33(3) | 18(2) | 25(3) | 3(2)   | 2(2)  | 2(2)   |
| C(17) | 24(3) | 22(3) | 24(3) | 3(2)   | -2(2) | -5(2)  |
| C(18) | 29(3) | 23(3) | 29(3) | -1(2)  | 0(2)  | -4(2)  |
| C(19) | 26(3) | 36(3) | 29(3) | -3(2)  | -3(2) | 2(2)   |
| C(20) | 32(3) | 38(3) | 28(3) | -6(3)  | -5(2) | 11(2)  |
| C(21) | 52(4) | 44(4) | 40(3) | 3(3)   | -7(3) | 17(3)  |
| C(22) | 75(5) | 58(4) | 26(3) | 7(3)   | -2(3) | 21(4)  |
| C(23) | 55(4) | 51(4) | 36(3) | -5(3)  | 4(3)  | 18(3)  |
| C(24) | 54(4) | 35(3) | 26(3) | 1(3)   | -8(3) | 11(3)  |
| C(25) | 34(3) | 22(3) | 20(2) | -1(2)  | 3(2)  | 3(2)   |
| C(26) | 46(4) | 25(3) | 31(3) | -1(2)  | -2(3) | -7(2)  |
| C(27) | 34(3) | 25(3) | 22(3) | -4(2)  | -4(2) | -2(2)  |
| C(28) | 34(3) | 33(3) | 28(3) | -1(2)  | 3(2)  | -1(2)  |
| C(29) | 64(4) | 27(3) | 49(4) | 0(3)   | 3(3)  | -10(3) |

|        |        |        |        |        |        |         |
|--------|--------|--------|--------|--------|--------|---------|
| C (30) | 52 (4) | 51 (4) | 44 (4) | -1 (3) | 2 (3)  | -22 (3) |
| C (31) | 42 (4) | 67 (5) | 46 (4) | -8 (3) | 12 (3) | -12 (3) |
| C (32) | 33 (3) | 37 (3) | 41 (3) | -2 (3) | 2 (3)  | -3 (3)  |
| C (33) | 45 (4) | 47 (4) | 57 (4) | -1 (3) | 7 (3)  | -11 (3) |

---

Table 5. Hydrogen coordinates ( $\times 10^4$ ) and isotropic displacement parameters ( $\text{\AA}^2 \times 10^3$ ) for a.

|        | x     | y     | z    | U(eq) |
|--------|-------|-------|------|-------|
| H(3)   | 11072 | 8818  | 3793 | 38    |
| H(4)   | 4255  | 5811  | 3819 | 69    |
| H(1)   | 10638 | 1777  | 3859 | 29    |
| H(1C)  | 10270 | 8414  | 2228 | 53    |
| H(1A)  | 9948  | 7737  | 1892 | 53    |
| H(1B)  | 10900 | 7315  | 2138 | 53    |
| H(3A)  | 11133 | 7695  | 2704 | 30    |
| H(6)   | 8461  | 5864  | 3345 | 27    |
| H(8C)  | 6836  | 6500  | 3013 | 58    |
| H(8B)  | 7086  | 5227  | 2998 | 58    |
| H(8A)  | 6400  | 5791  | 2697 | 58    |
| H(9B)  | 11865 | 8277  | 3363 | 32    |
| H(9A)  | 12277 | 7037  | 3389 | 32    |
| H(10)  | 11715 | 7262  | 3951 | 32    |
| H(12A) | 8796  | 6093  | 3953 | 31    |
| H(12B) | 9240  | 7240  | 4093 | 31    |
| H(13B) | 10400 | 6433  | 4479 | 35    |
| H(13A) | 9429  | 5559  | 4483 | 35    |
| H(14)  | 11334 | 4780  | 4313 | 29    |
| H(15)  | 11692 | 5357  | 3712 | 28    |
| H(16)  | 9488  | 4471  | 3830 | 31    |
| H(17A) | 10965 | 3331  | 3537 | 28    |
| H(17B) | 11548 | 3339  | 3905 | 28    |
| H(18A) | 8915  | 1462  | 3704 | 32    |
| H(18B) | 8614  | 2717  | 3746 | 32    |
| H(20)  | 8511  | 3749  | 3251 | 39    |
| H(21)  | 8847  | 4073  | 2669 | 54    |
| H(22)  | 9877  | 2843  | 2360 | 64    |
| H(23)  | 10674 | 1383  | 2629 | 57    |
| H(24)  | 10359 | 1055  | 3214 | 46    |
| H(25)  | 9518  | 3098  | 4329 | 30    |
| H(26A) | 11370 | 1736  | 4426 | 51    |
| H(26C) | 10730 | 2269  | 4742 | 51    |
| H(26B) | 11334 | 3027  | 4468 | 51    |
| H(28)  | 10178 | 231   | 4303 | 38    |
| H(29)  | 9015  | -1120 | 4497 | 56    |

|        |      |      |      |    |
|--------|------|------|------|----|
| H(30)  | 7264 | -704 | 4679 | 59 |
| H(31)  | 6669 | 1080 | 4657 | 62 |
| H(32)  | 7834 | 2458 | 4477 | 44 |
| H(33A) | 3355 | 5111 | 4382 | 74 |
| H(33B) | 3125 | 6363 | 4301 | 74 |
| H(33C) | 4345 | 5945 | 4350 | 74 |

---

Table 6. Torsion angles [deg] for a.

---

|                         |           |
|-------------------------|-----------|
| C(1)–O(1)–C(2)–C(3)     | –3.1(7)   |
| C(1)–O(1)–C(2)–C(7)     | 175.7(4)  |
| O(1)–C(2)–C(3)–C(4)     | 179.2(5)  |
| C(7)–C(2)–C(3)–C(4)     | 0.4(7)    |
| C(2)–C(3)–C(4)–C(5)     | 1.5(7)    |
| C(2)–C(3)–C(4)–C(9)     | –178.4(5) |
| C(3)–C(4)–C(5)–C(6)     | –1.6(7)   |
| C(9)–C(4)–C(5)–C(6)     | 178.3(4)  |
| C(3)–C(4)–C(5)–C(11)    | 176.9(4)  |
| C(9)–C(4)–C(5)–C(11)    | –3.2(5)   |
| C(4)–C(5)–C(6)–C(7)     | –0.2(7)   |
| C(11)–C(5)–C(6)–C(7)    | –178.4(5) |
| C(8)–O(2)–C(7)–C(6)     | 22.0(7)   |
| C(8)–O(2)–C(7)–C(2)     | –160.2(5) |
| C(5)–C(6)–C(7)–O(2)     | 179.8(4)  |
| C(5)–C(6)–C(7)–C(2)     | 2.1(7)    |
| O(1)–C(2)–C(7)–O(2)     | 1.0(7)    |
| C(3)–C(2)–C(7)–O(2)     | 179.9(4)  |
| O(1)–C(2)–C(7)–C(6)     | 178.9(4)  |
| C(3)–C(2)–C(7)–C(6)     | –2.2(8)   |
| C(5)–C(4)–C(9)–C(10)    | –17.3(5)  |
| C(3)–C(4)–C(9)–C(10)    | 162.6(5)  |
| C(4)–C(9)–C(10)–O(3)    | –85.8(5)  |
| C(4)–C(9)–C(10)–C(11)   | 30.4(5)   |
| C(4)–C(5)–C(11)–C(12)   | 148.3(4)  |
| C(6)–C(5)–C(11)–C(12)   | –33.3(7)  |
| C(4)–C(5)–C(11)–C(10)   | 21.9(5)   |
| C(6)–C(5)–C(11)–C(10)   | –159.8(5) |
| C(4)–C(5)–C(11)–C(15)   | –91.1(5)  |
| C(6)–C(5)–C(11)–C(15)   | 87.2(6)   |
| O(3)–C(10)–C(11)–C(12)  | –42.7(6)  |
| C(9)–C(10)–C(11)–C(12)  | –160.6(4) |
| O(3)–C(10)–C(11)–C(5)   | 86.0(4)   |
| C(9)–C(10)–C(11)–C(5)   | –31.8(5)  |
| O(3)–C(10)–C(11)–C(15)  | –156.9(4) |
| C(9)–C(10)–C(11)–C(15)  | 85.3(5)   |
| C(5)–C(11)–C(12)–C(13)  | 157.5(4)  |
| C(10)–C(11)–C(12)–C(13) | –83.0(5)  |
| C(15)–C(11)–C(12)–C(13) | 32.7(5)   |
| C(11)–C(12)–C(13)–C(14) | –33.2(5)  |
| C(12)–C(13)–C(14)–C(15) | 20.4(5)   |

|                         |            |
|-------------------------|------------|
| C(12)-C(13)-C(14)-C(16) | -44.1 (6)  |
| C(13)-C(14)-C(15)-C(16) | -112.3 (5) |
| C(13)-C(14)-C(15)-C(11) | -0.3 (5)   |
| C(16)-C(14)-C(15)-C(11) | 112.0 (4)  |
| C(12)-C(11)-C(15)-C(16) | 45.0 (5)   |
| C(5)-C(11)-C(15)-C(16)  | -83.9 (5)  |
| C(10)-C(11)-C(15)-C(16) | 166.5 (4)  |
| C(12)-C(11)-C(15)-C(14) | -20.0 (5)  |
| C(5)-C(11)-C(15)-C(14)  | -148.9 (4) |
| C(10)-C(11)-C(15)-C(14) | 101.5 (4)  |
| C(14)-C(15)-C(16)-C(17) | -109.1 (5) |
| C(11)-C(15)-C(16)-C(17) | 155.9 (4)  |
| C(11)-C(15)-C(16)-C(14) | -95.0 (5)  |
| C(13)-C(14)-C(16)-C(15) | 95.5 (5)   |
| C(15)-C(14)-C(16)-C(17) | 105.2 (5)  |
| C(13)-C(14)-C(16)-C(17) | -159.3 (4) |
| C(18)-N(1)-C(17)-C(16)  | 70.9 (5)   |
| C(25)-N(1)-C(17)-C(16)  | -55.0 (5)  |
| C(15)-C(16)-C(17)-N(1)  | 174.1 (4)  |
| C(14)-C(16)-C(17)-N(1)  | 105.9 (5)  |
| C(17)-N(1)-C(18)-C(19)  | 43.0 (5)   |
| C(25)-N(1)-C(18)-C(19)  | 169.5 (4)  |
| N(1)-C(18)-C(19)-C(20)  | -111.3 (5) |
| N(1)-C(18)-C(19)-C(24)  | 69.0 (6)   |
| C(24)-C(19)-C(20)-C(21) | -0.8 (9)   |
| C(18)-C(19)-C(20)-C(21) | 179.6 (5)  |
| C(19)-C(20)-C(21)-C(22) | 1.7 (10)   |
| C(20)-C(21)-C(22)-C(23) | -2.3 (11)  |
| C(21)-C(22)-C(23)-C(24) | 2.0 (11)   |
| C(22)-C(23)-C(24)-C(19) | -1.1 (10)  |
| C(20)-C(19)-C(24)-C(23) | 0.5 (9)    |
| C(18)-C(19)-C(24)-C(23) | -179.9 (5) |
| C(17)-N(1)-C(25)-C(27)  | 172.4 (4)  |
| C(18)-N(1)-C(25)-C(27)  | 45.8 (5)   |
| C(17)-N(1)-C(25)-C(26)  | -63.6 (5)  |
| C(18)-N(1)-C(25)-C(26)  | 169.7 (4)  |
| C(26)-C(25)-C(27)-C(32) | 123.4 (5)  |
| N(1)-C(25)-C(27)-C(32)  | -113.3 (5) |
| C(26)-C(25)-C(27)-C(28) | -54.1 (6)  |
| N(1)-C(25)-C(27)-C(28)  | 69.2 (6)   |
| C(32)-C(27)-C(28)-C(29) | -1.9 (8)   |
| C(25)-C(27)-C(28)-C(29) | 175.6 (5)  |
| C(27)-C(28)-C(29)-C(30) | 1.0 (9)    |
| C(28)-C(29)-C(30)-C(31) | 0.6 (10)   |

|                         |           |
|-------------------------|-----------|
| C(29)–C(30)–C(31)–C(32) | –1.4(10)  |
| C(28)–C(27)–C(32)–C(31) | 1.1(8)    |
| C(25)–C(27)–C(32)–C(31) | –176.5(5) |
| C(30)–C(31)–C(32)–C(27) | 0.6(9)    |

---

Symmetry transformations used to generate equivalent atoms:

Table 7. Hydrogen bonds for a [A and deg.].

---

| D-H...A | d(D-H) | d(H...A) | d(D...A) | <(DHA) |
|---------|--------|----------|----------|--------|
|---------|--------|----------|----------|--------|



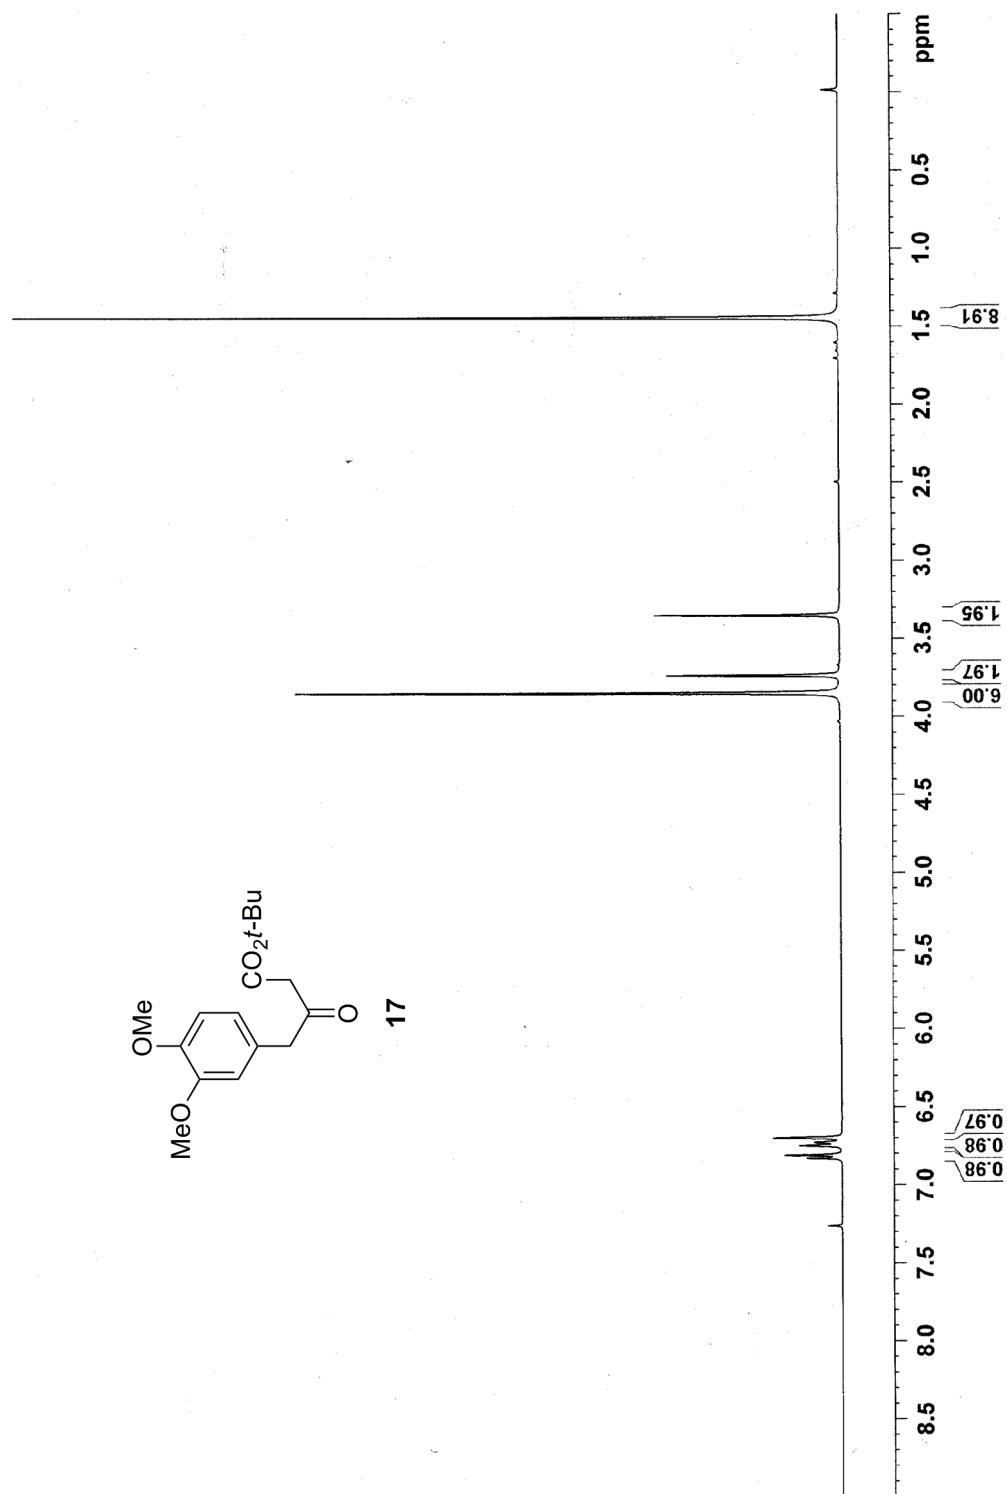

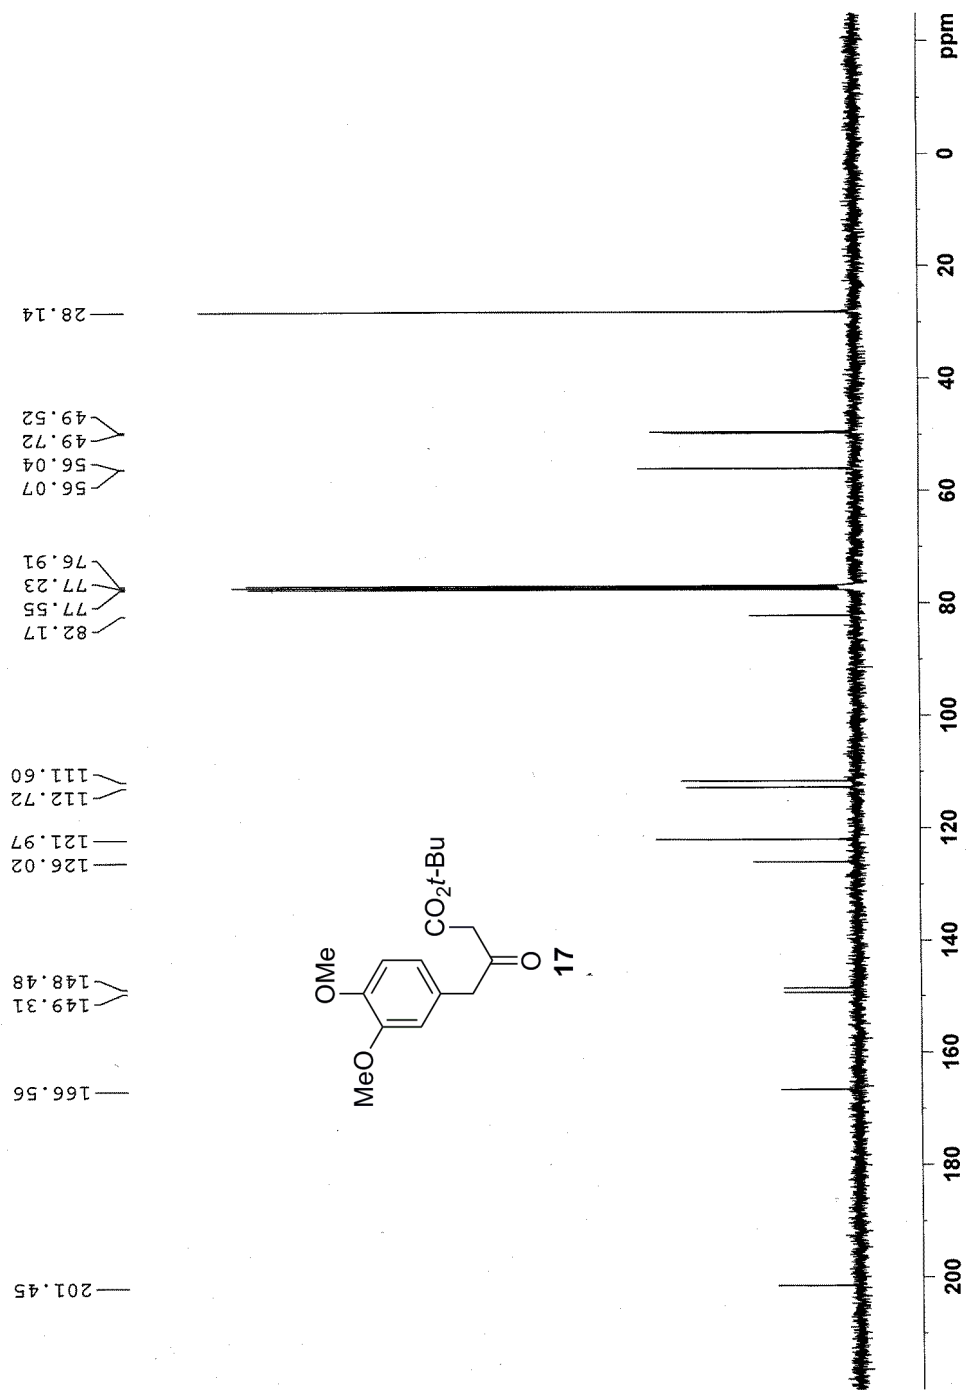

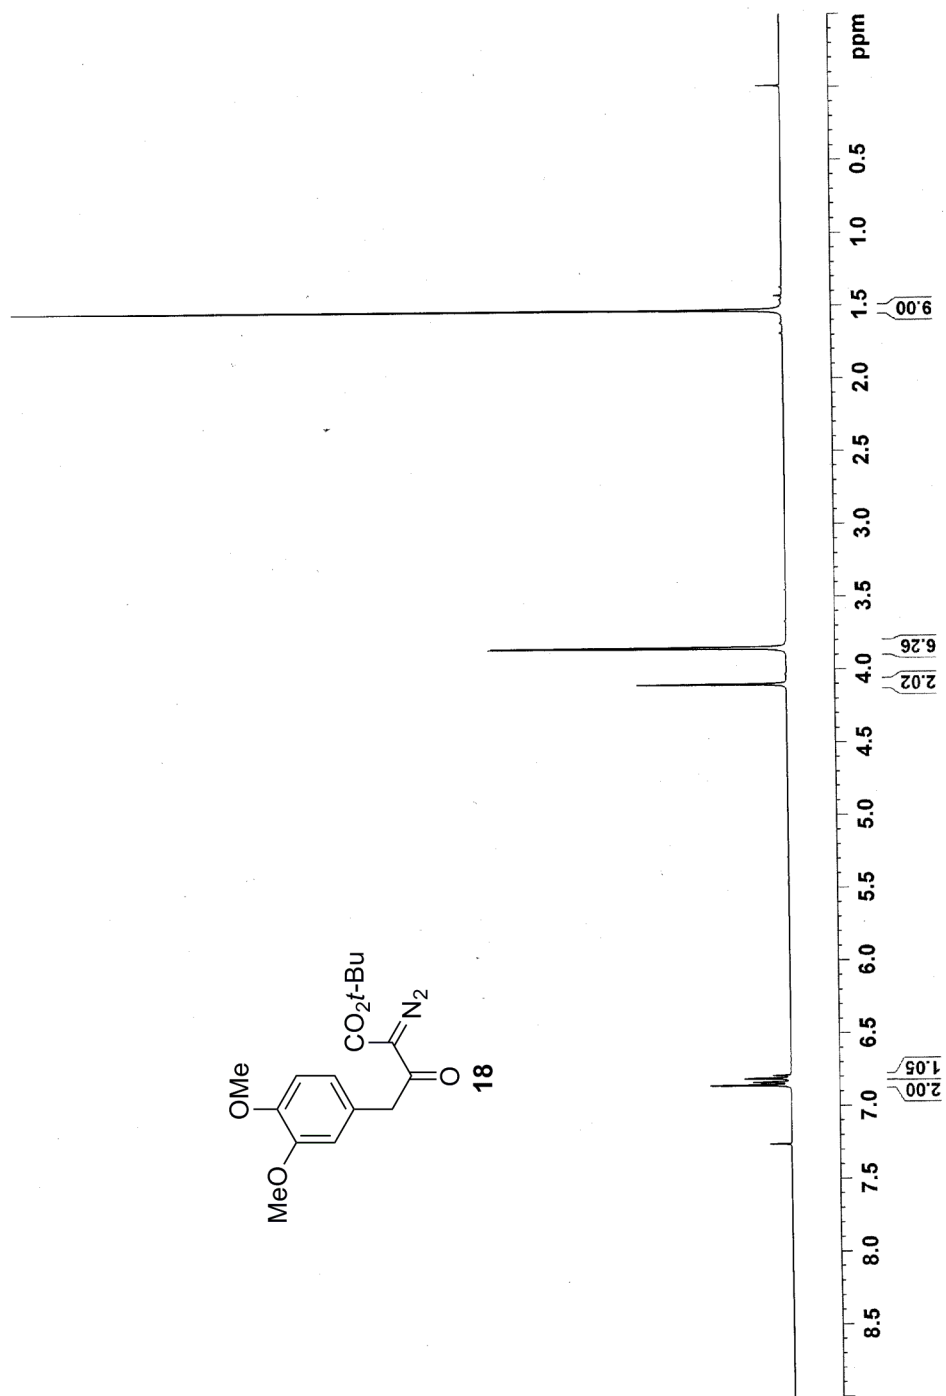

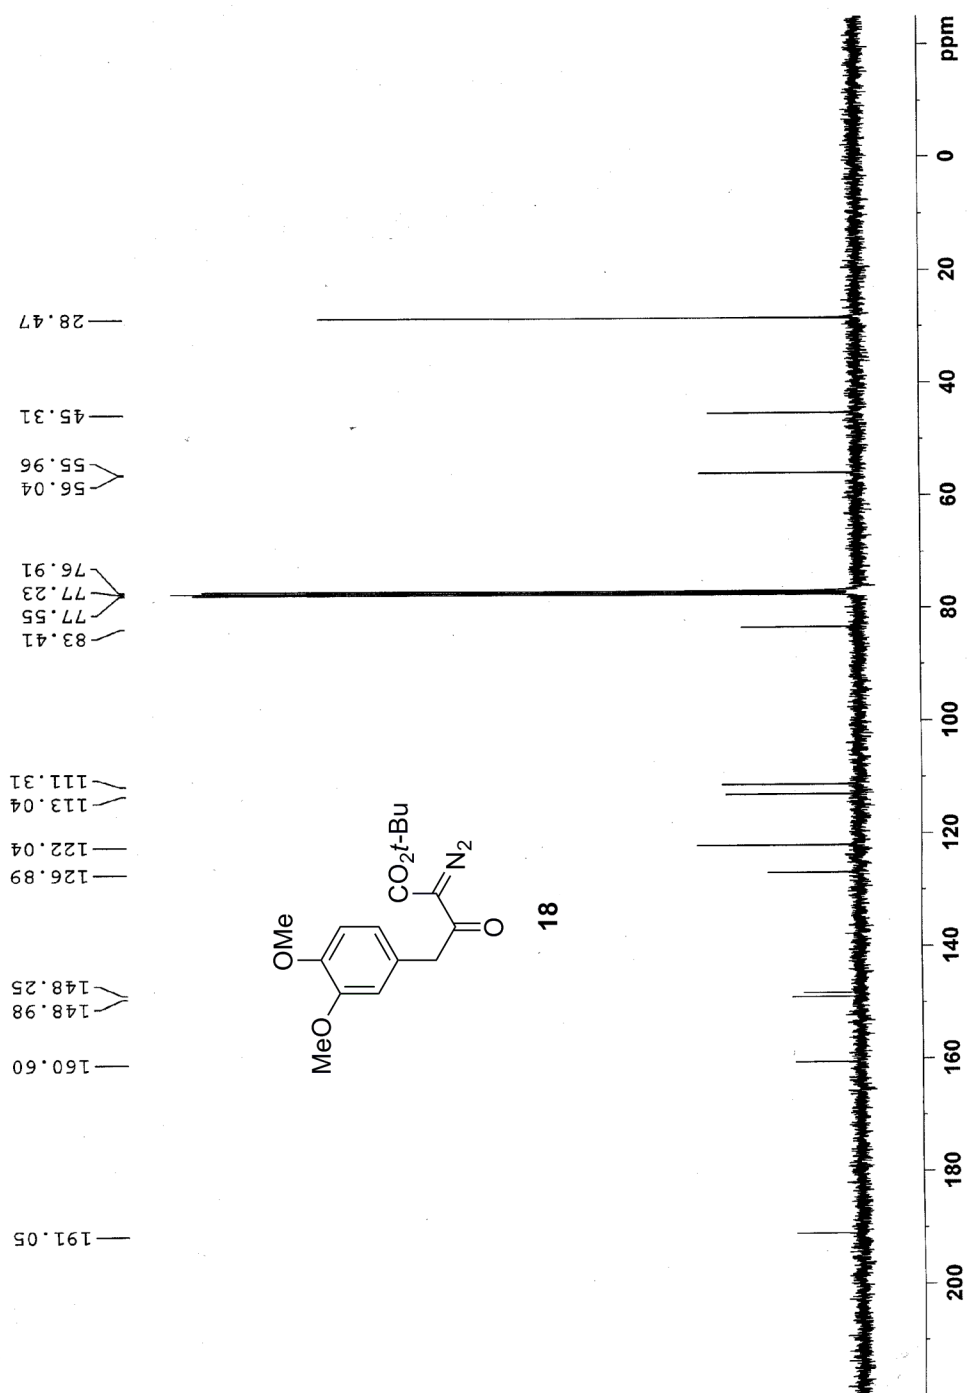

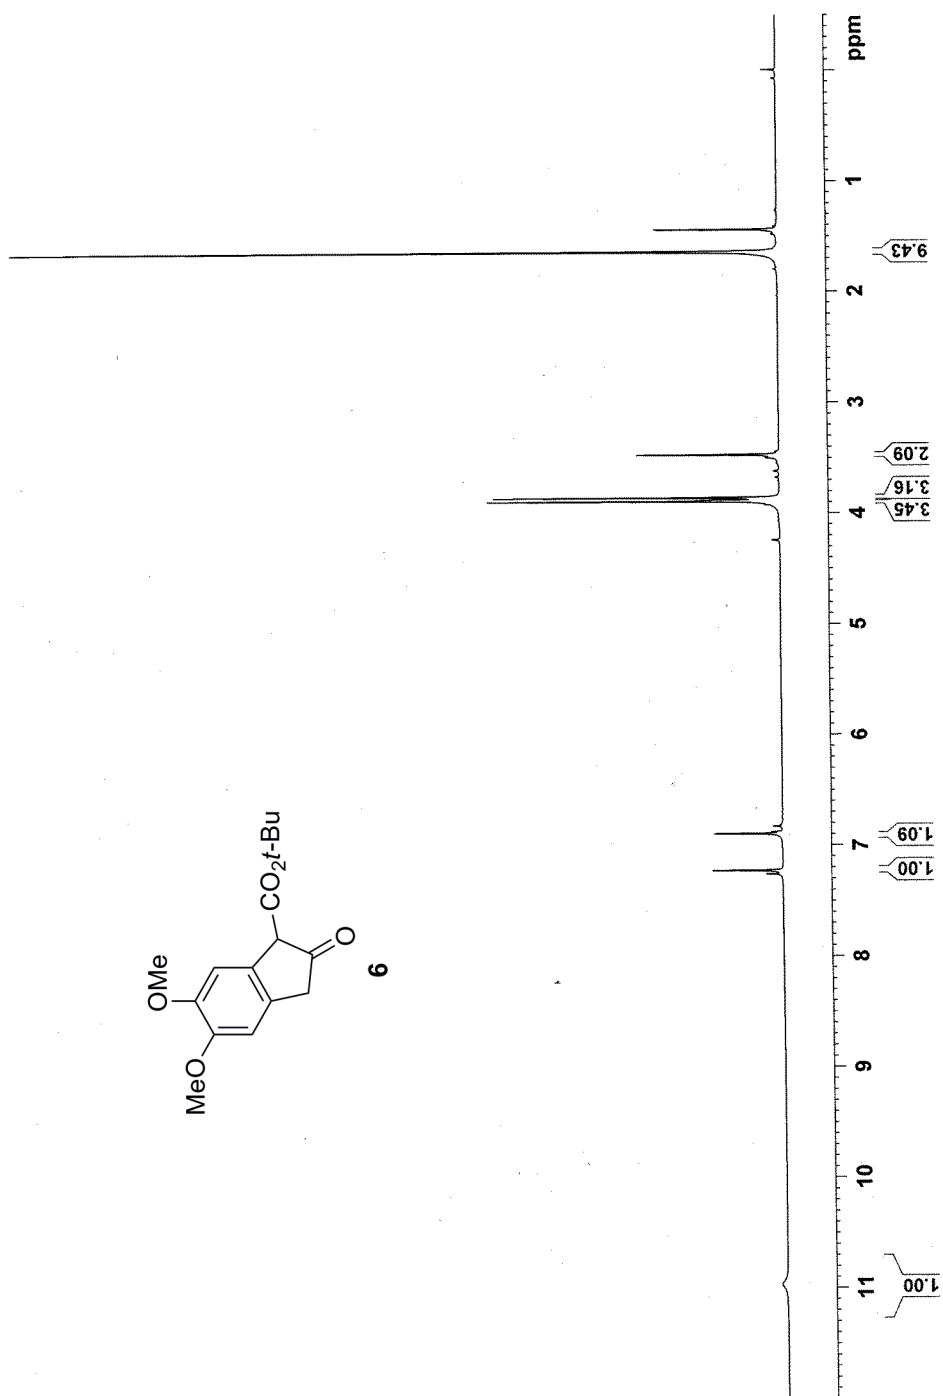

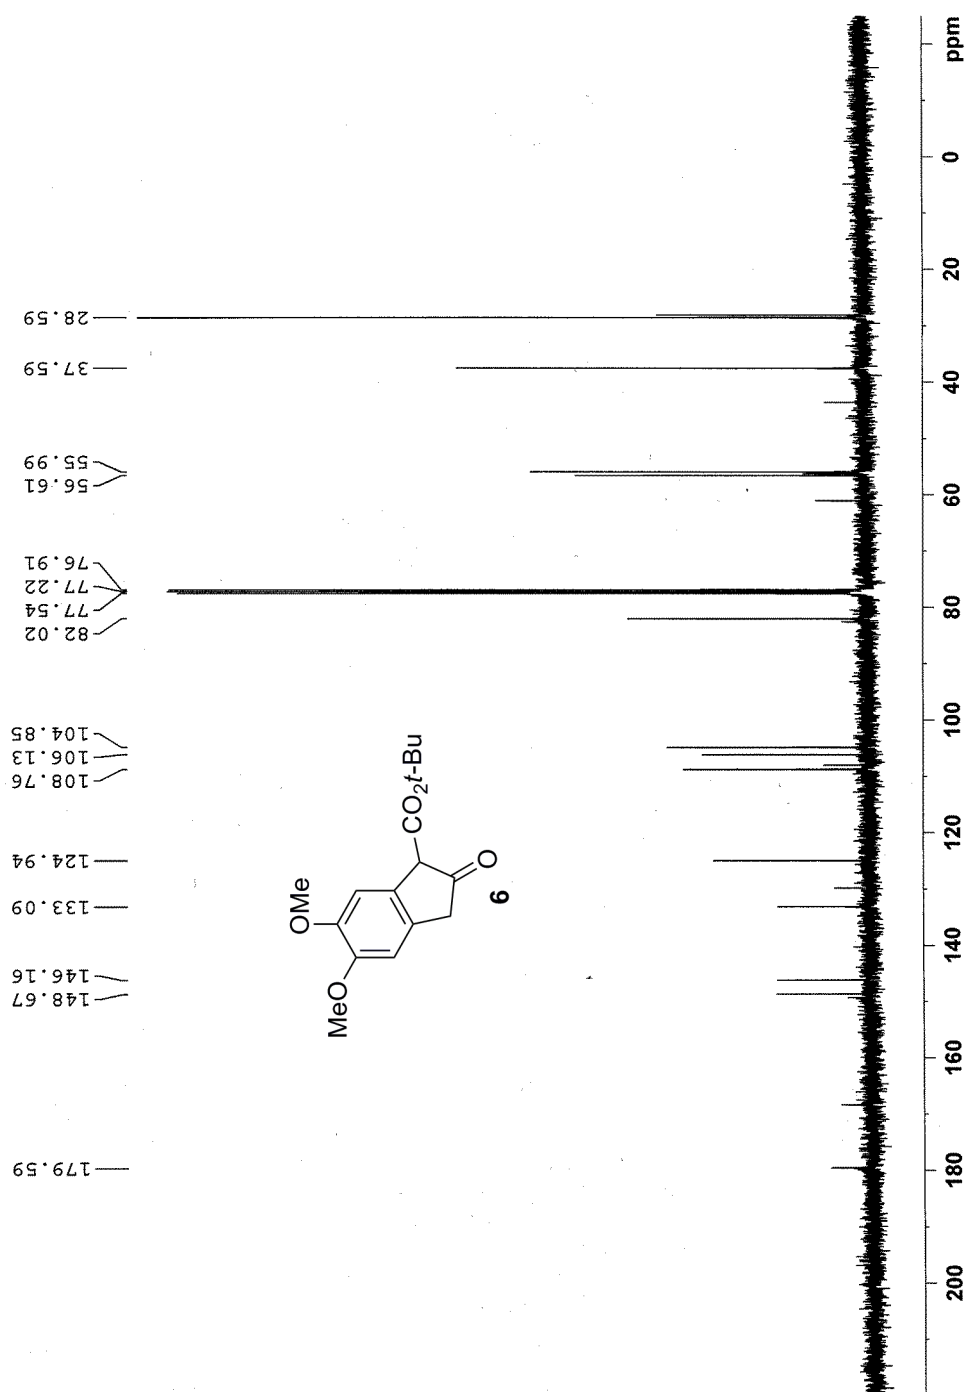

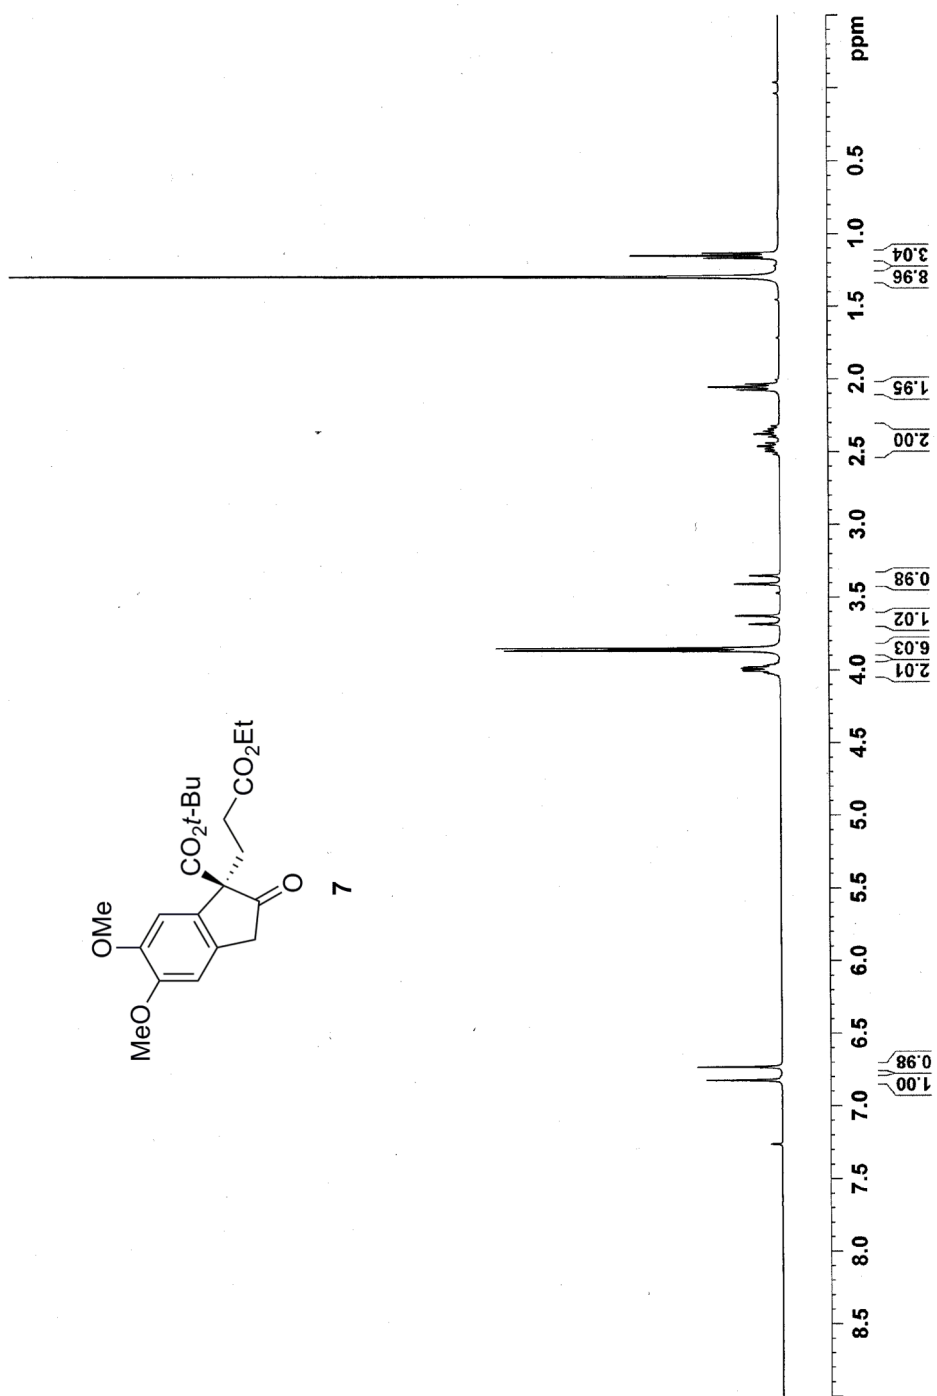

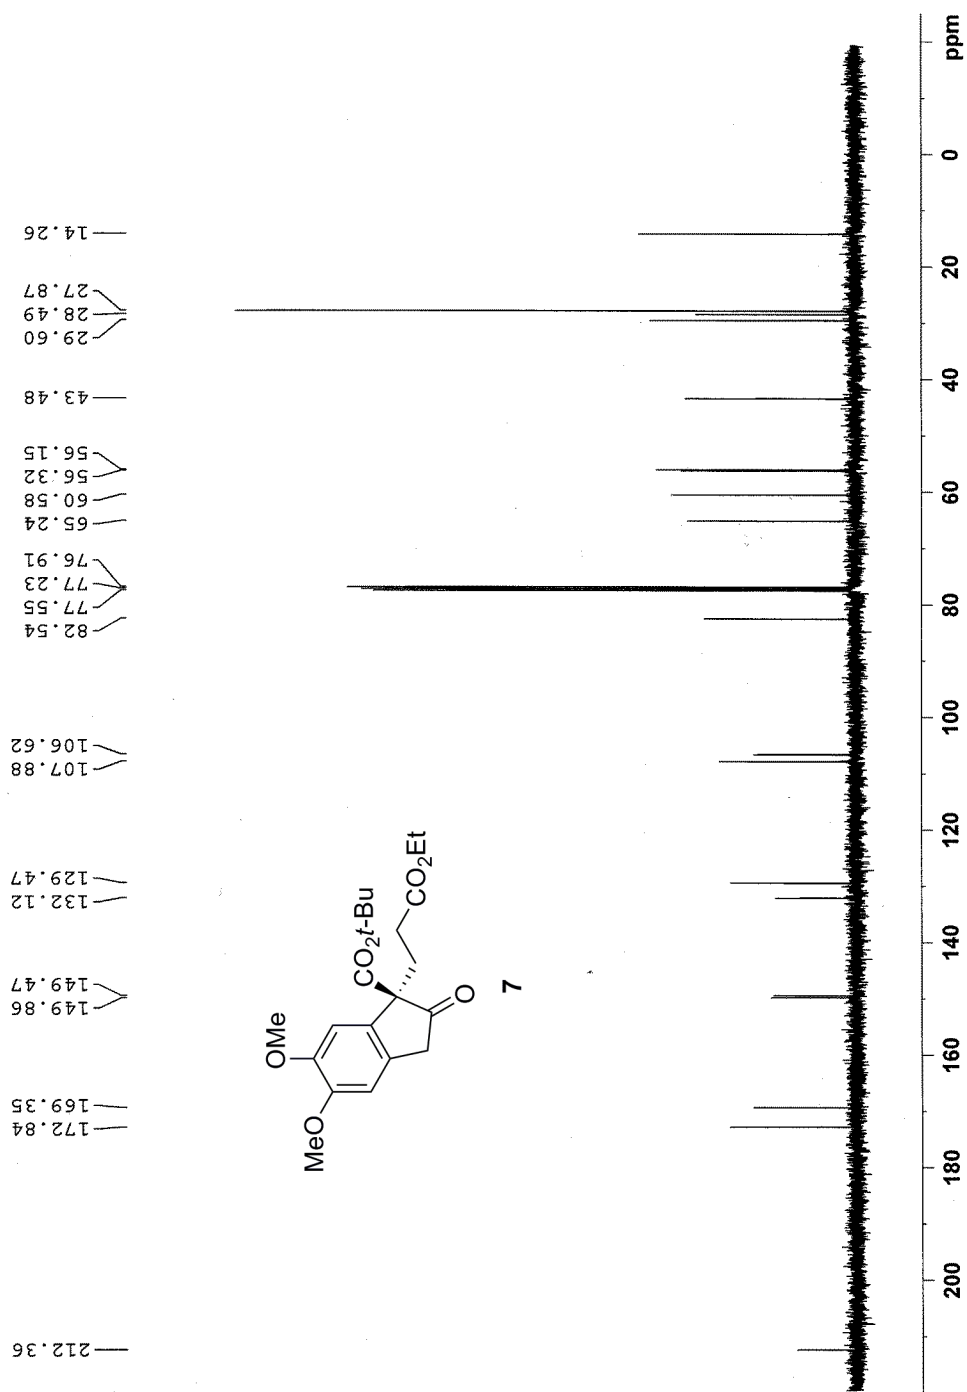



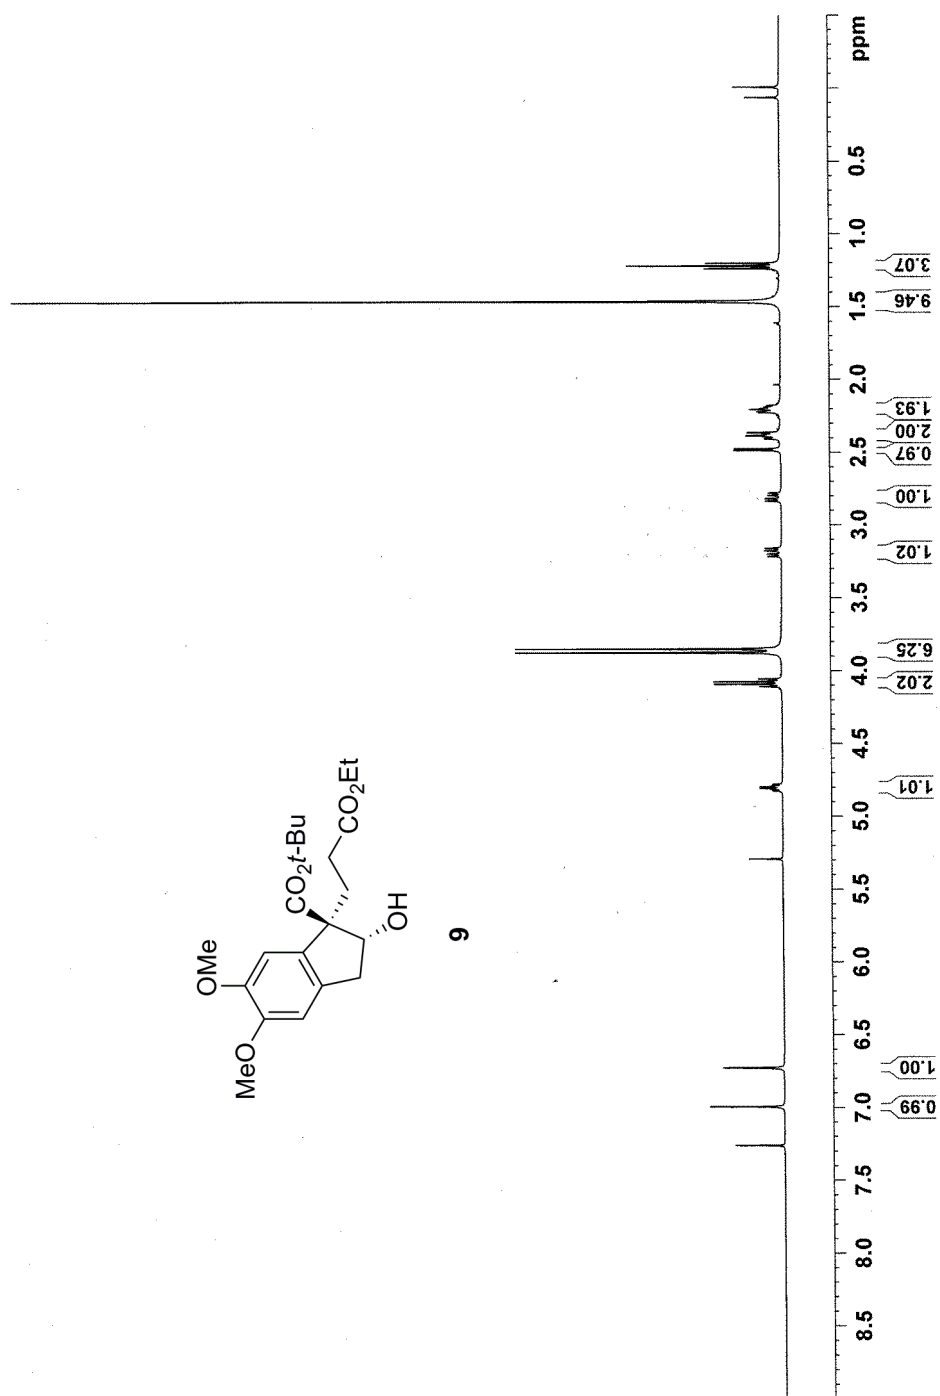

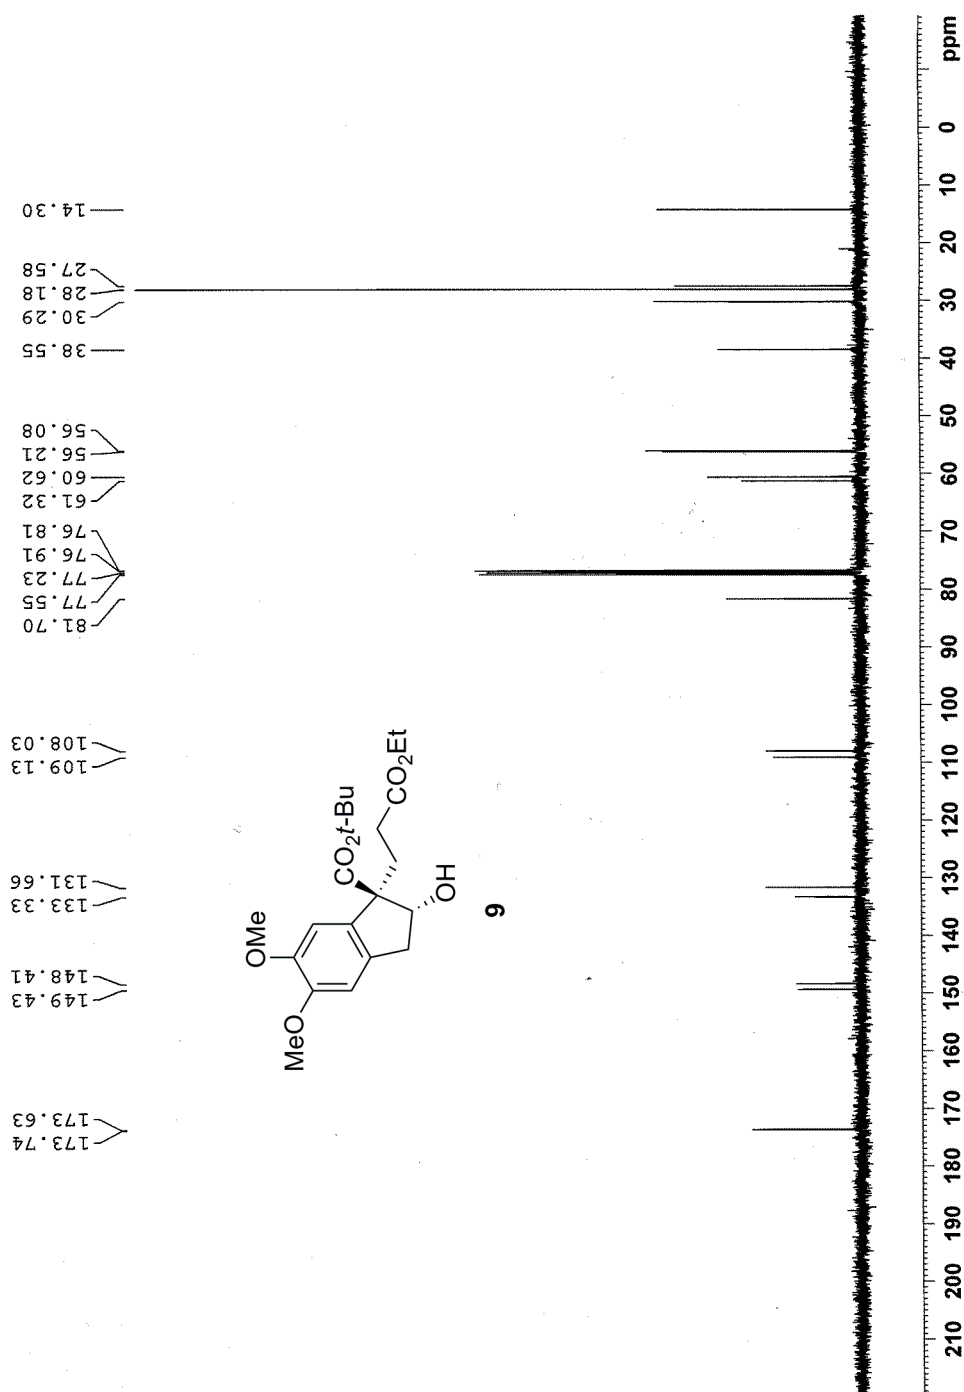

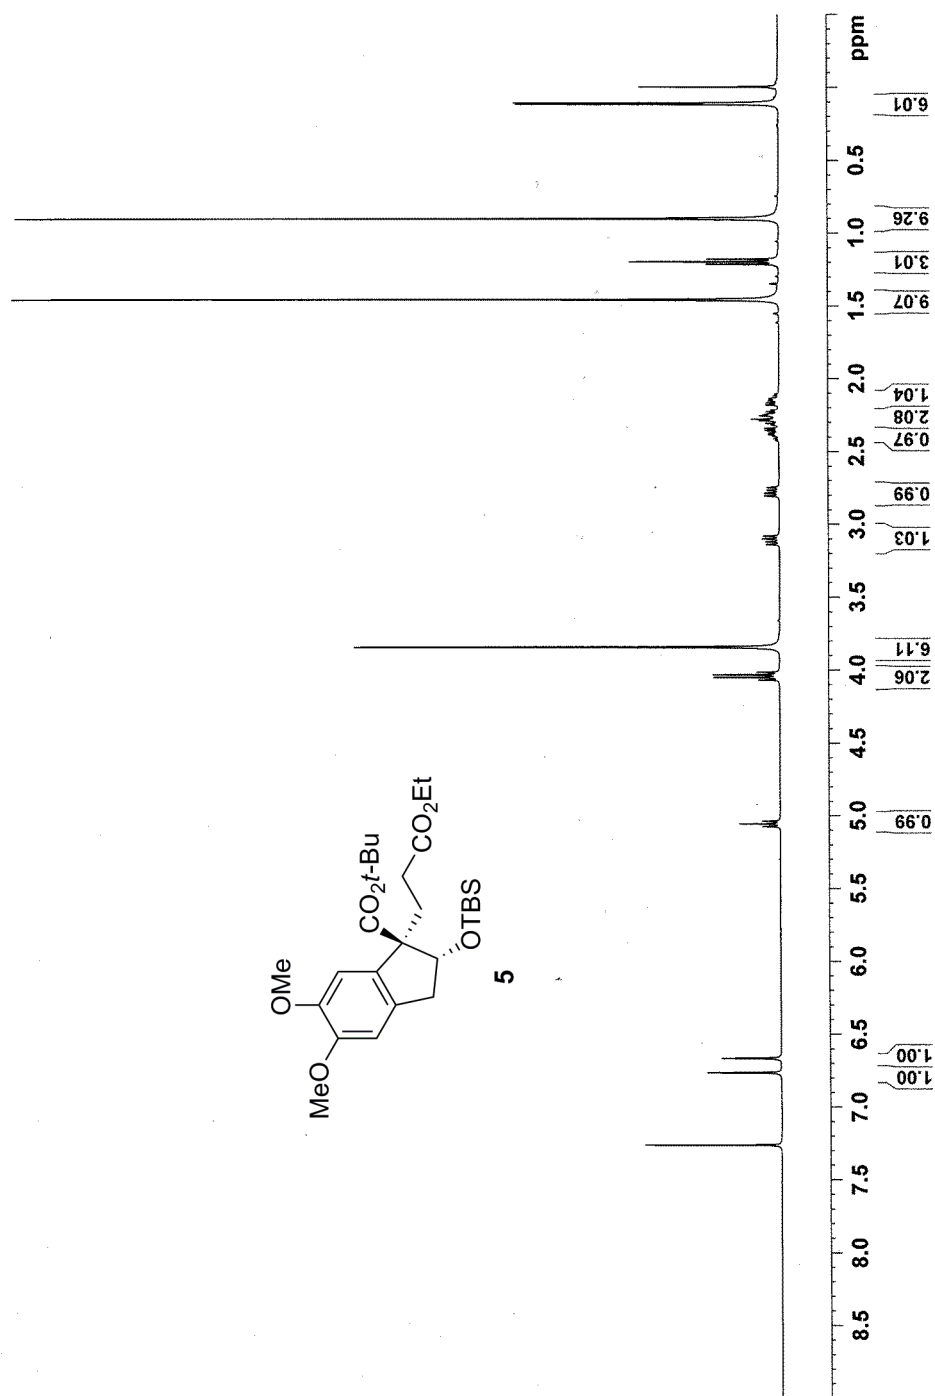

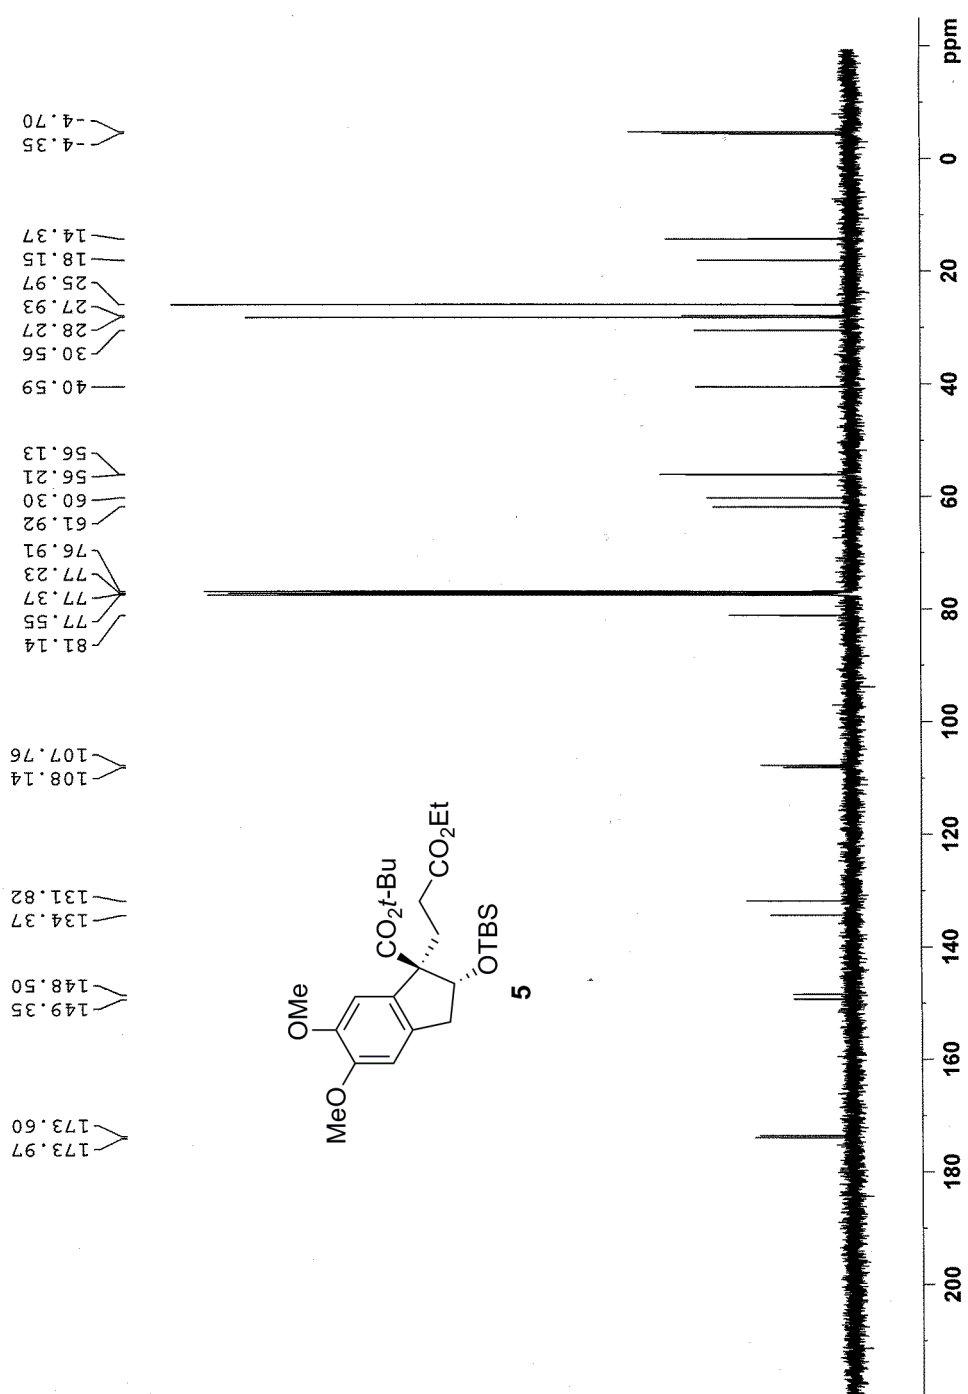

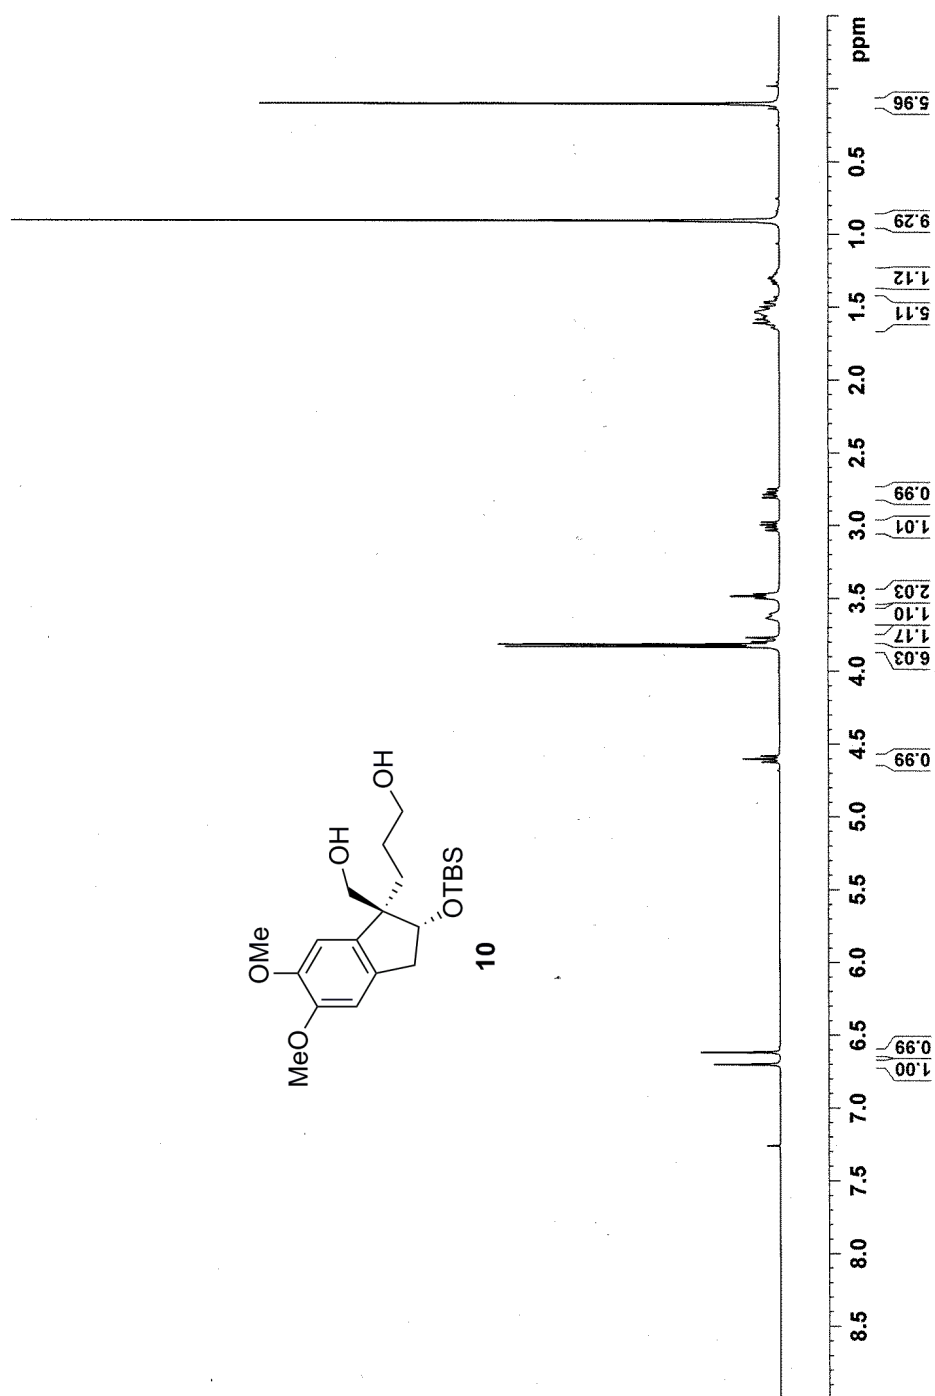

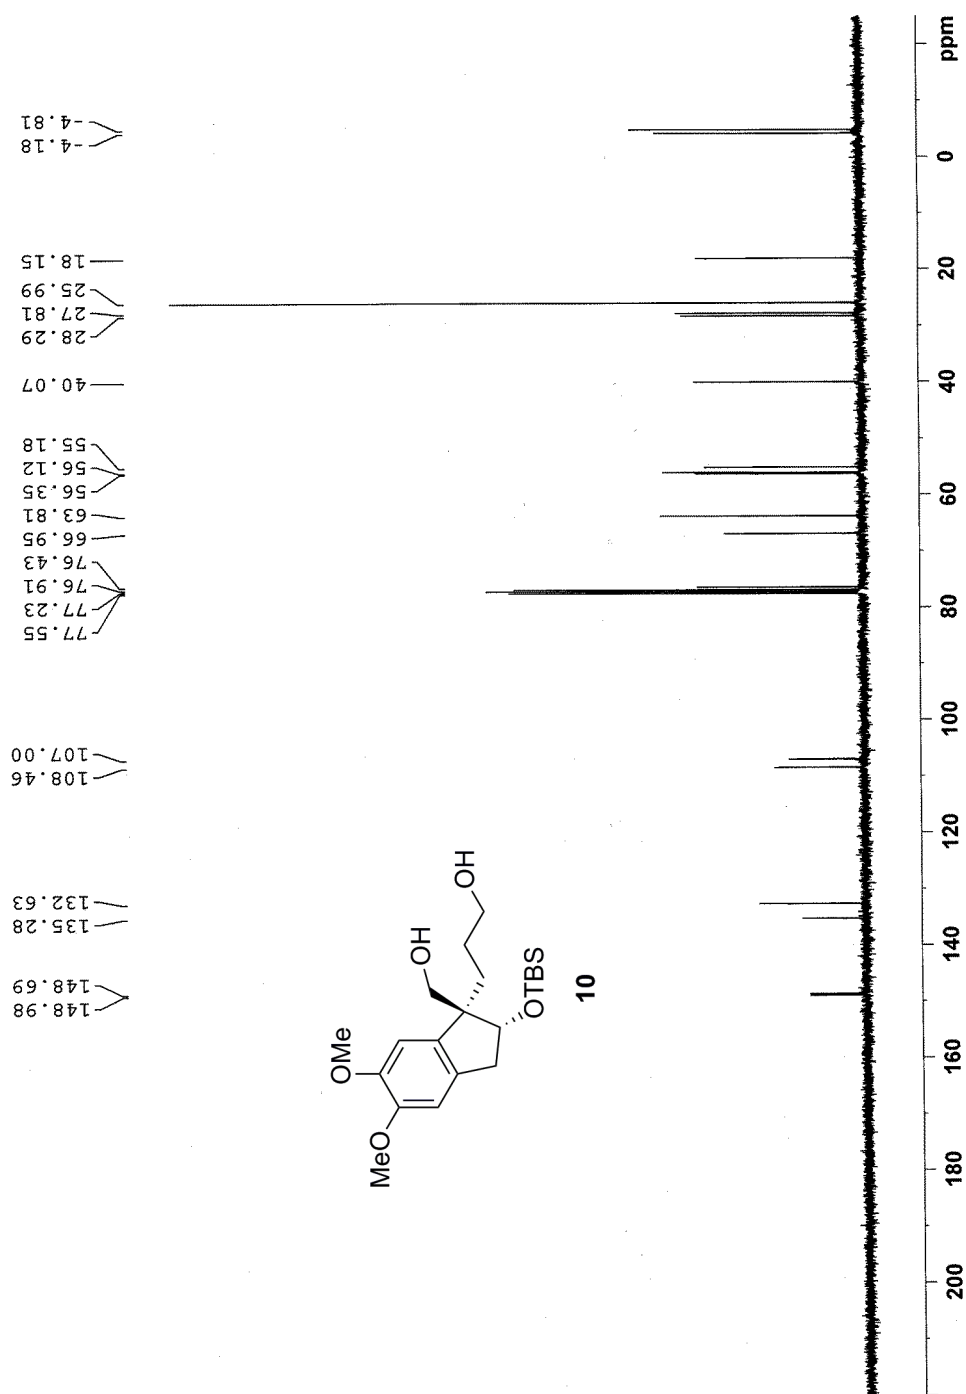

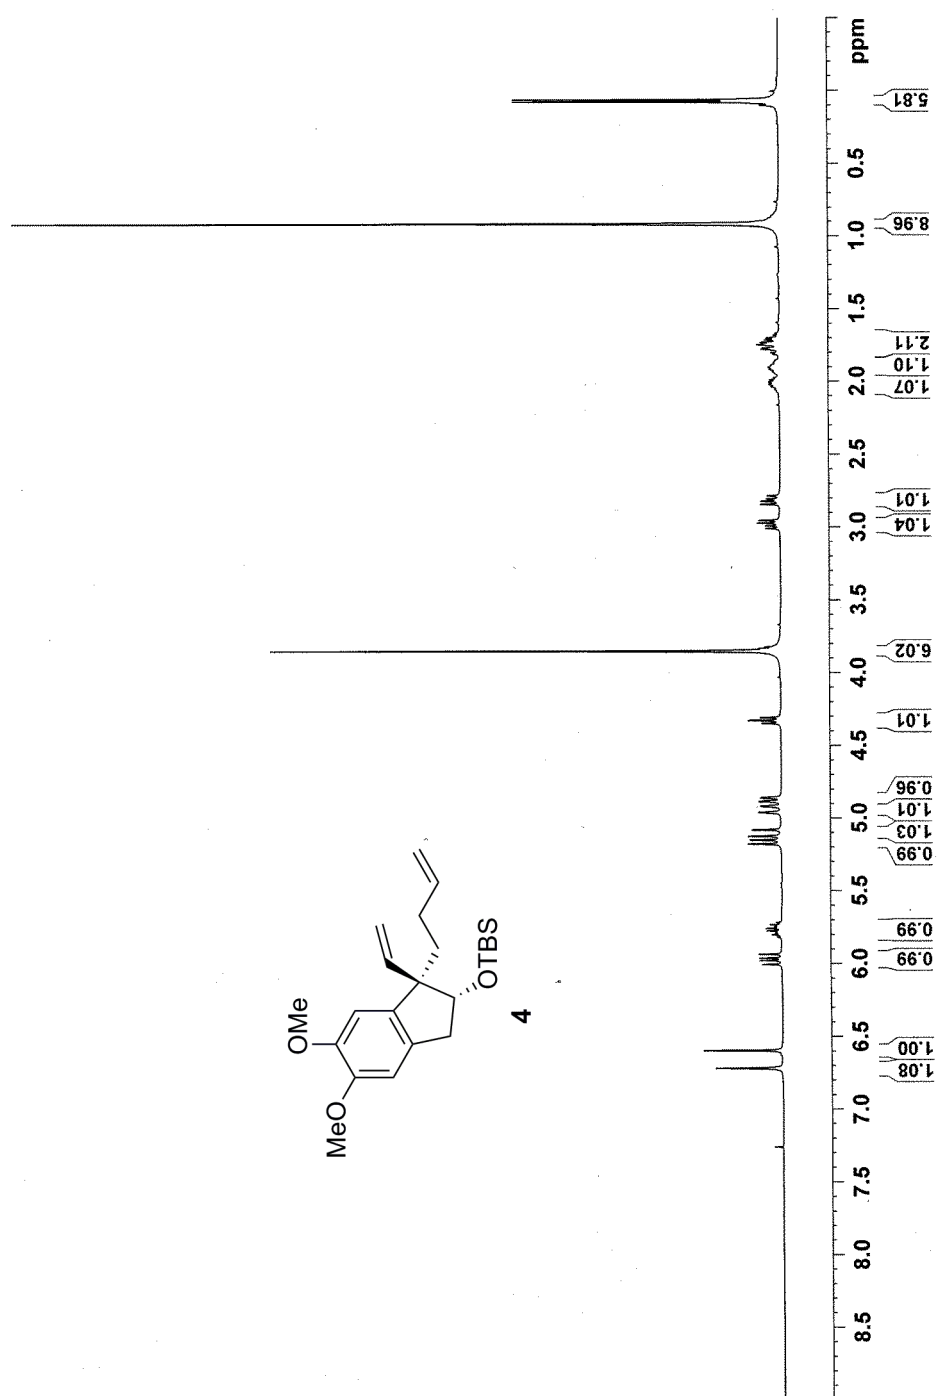

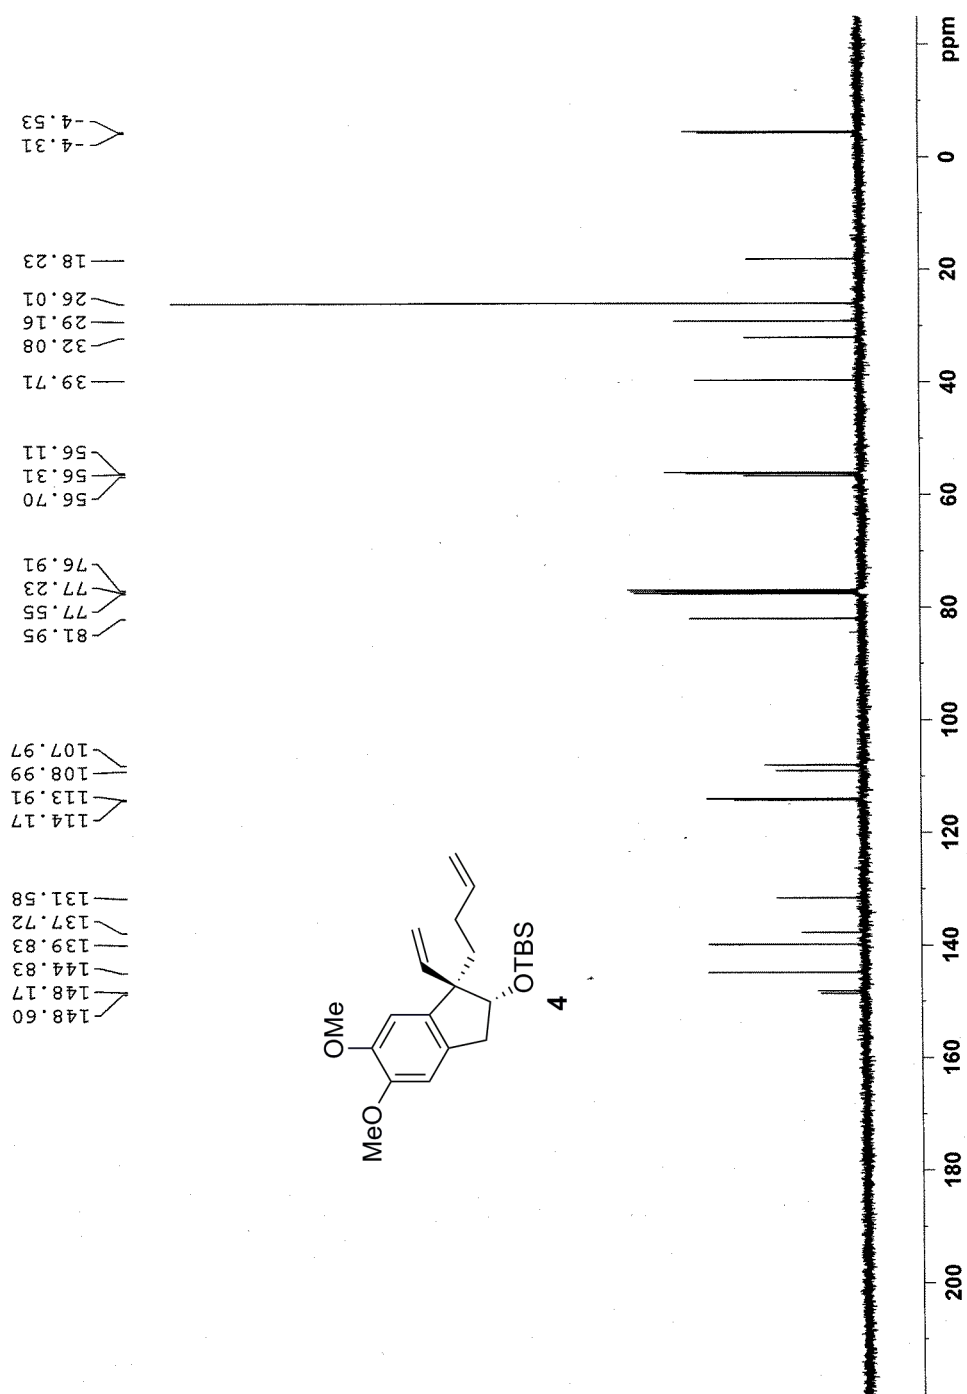



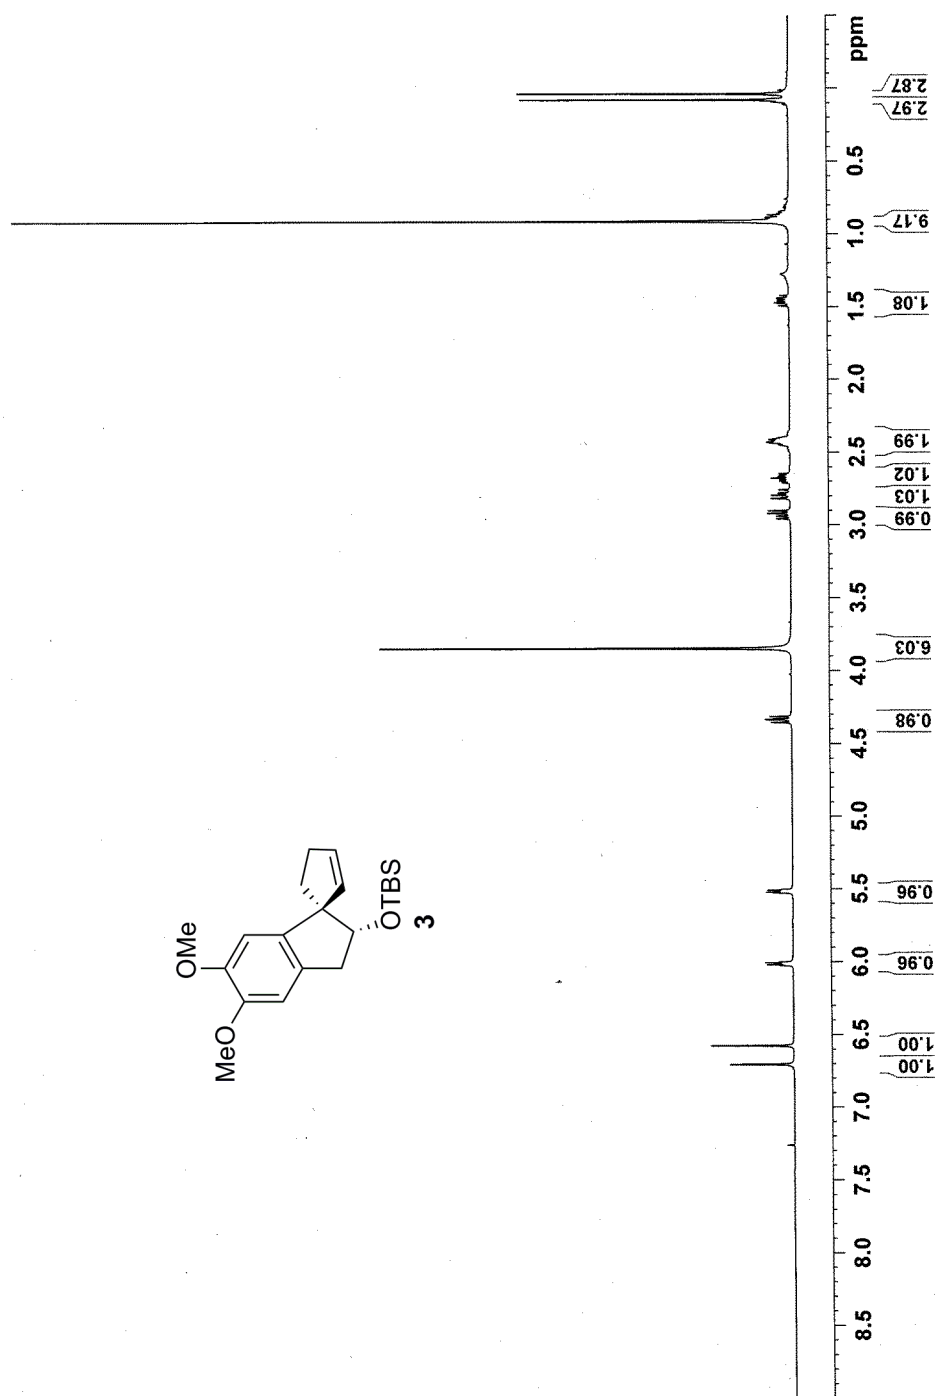

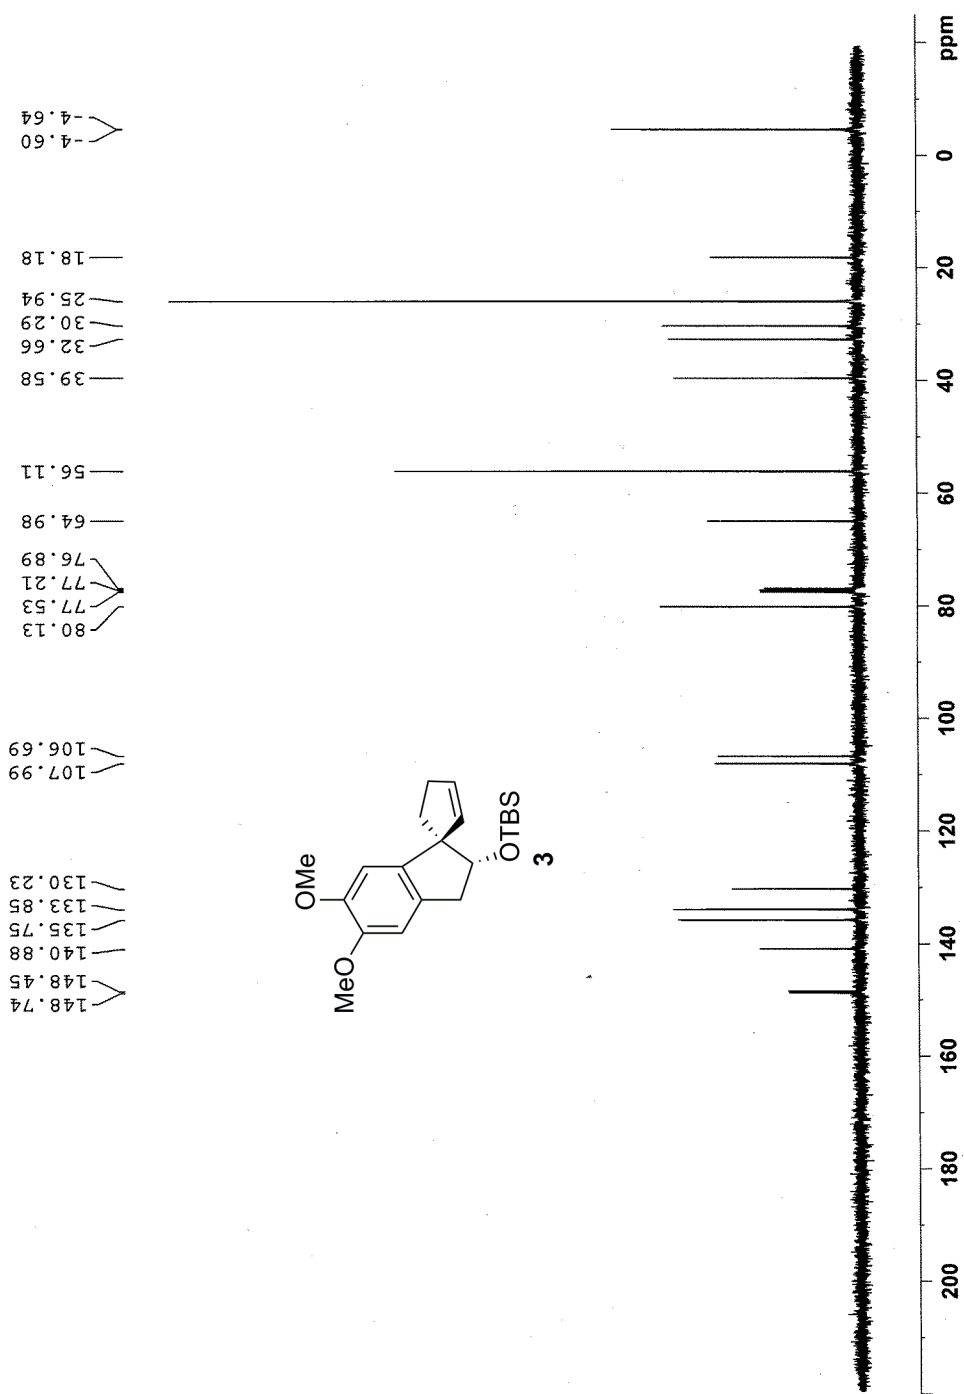

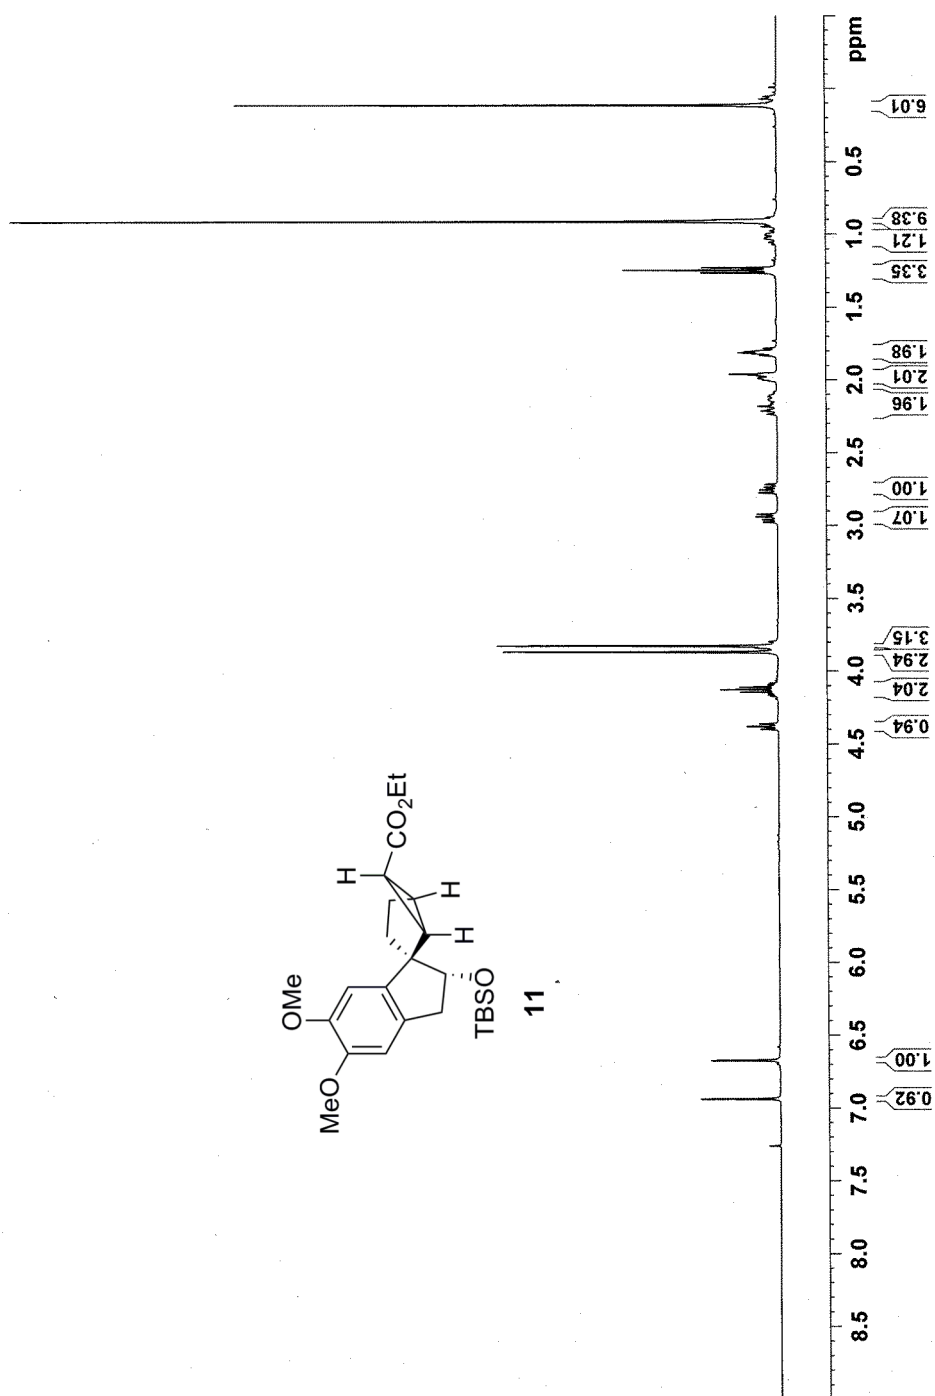

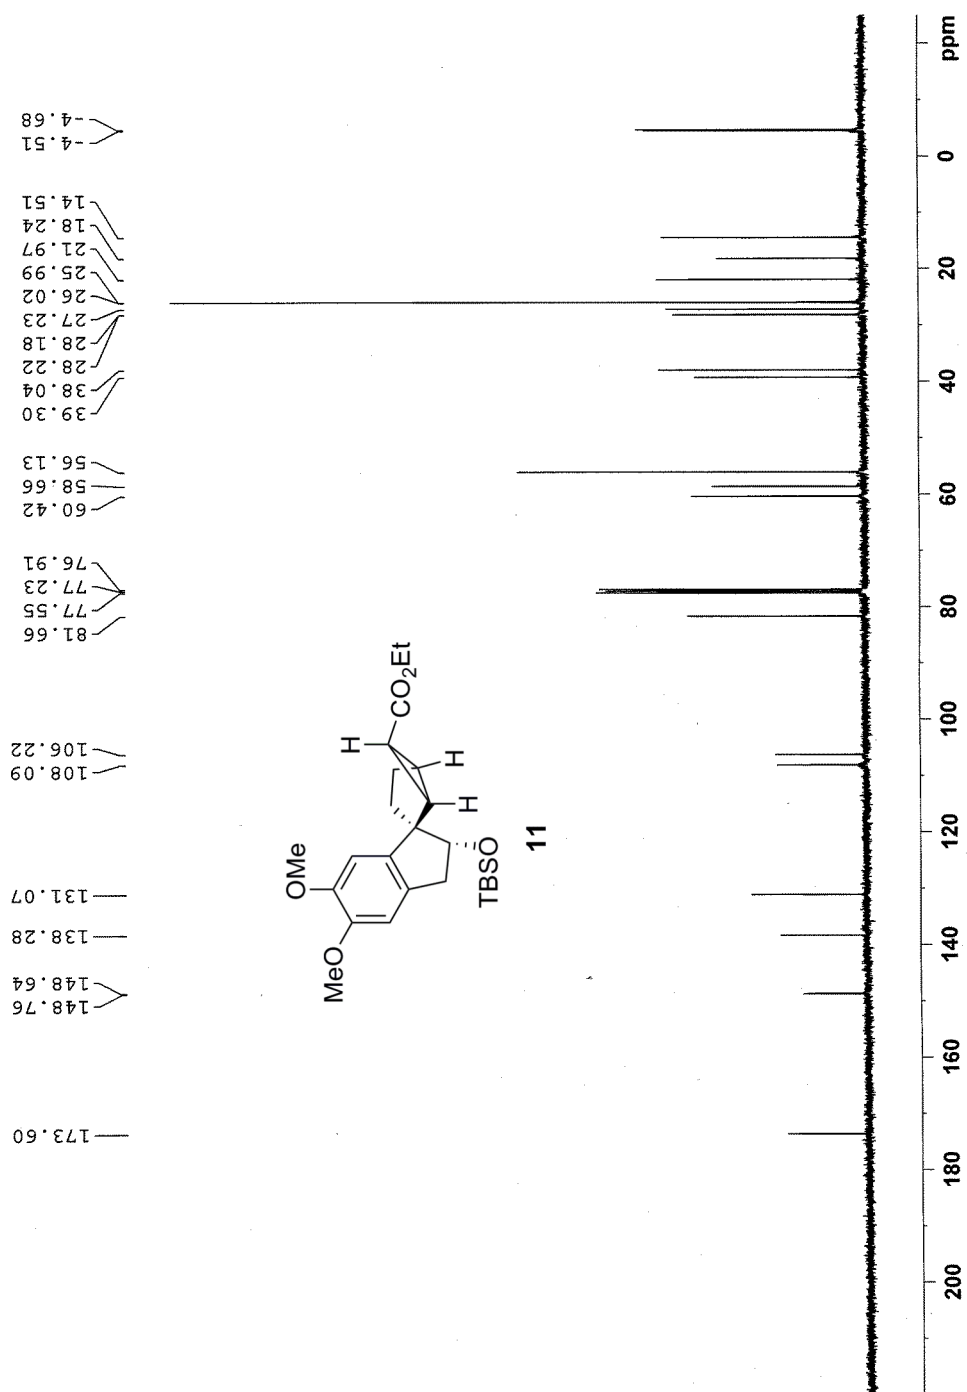

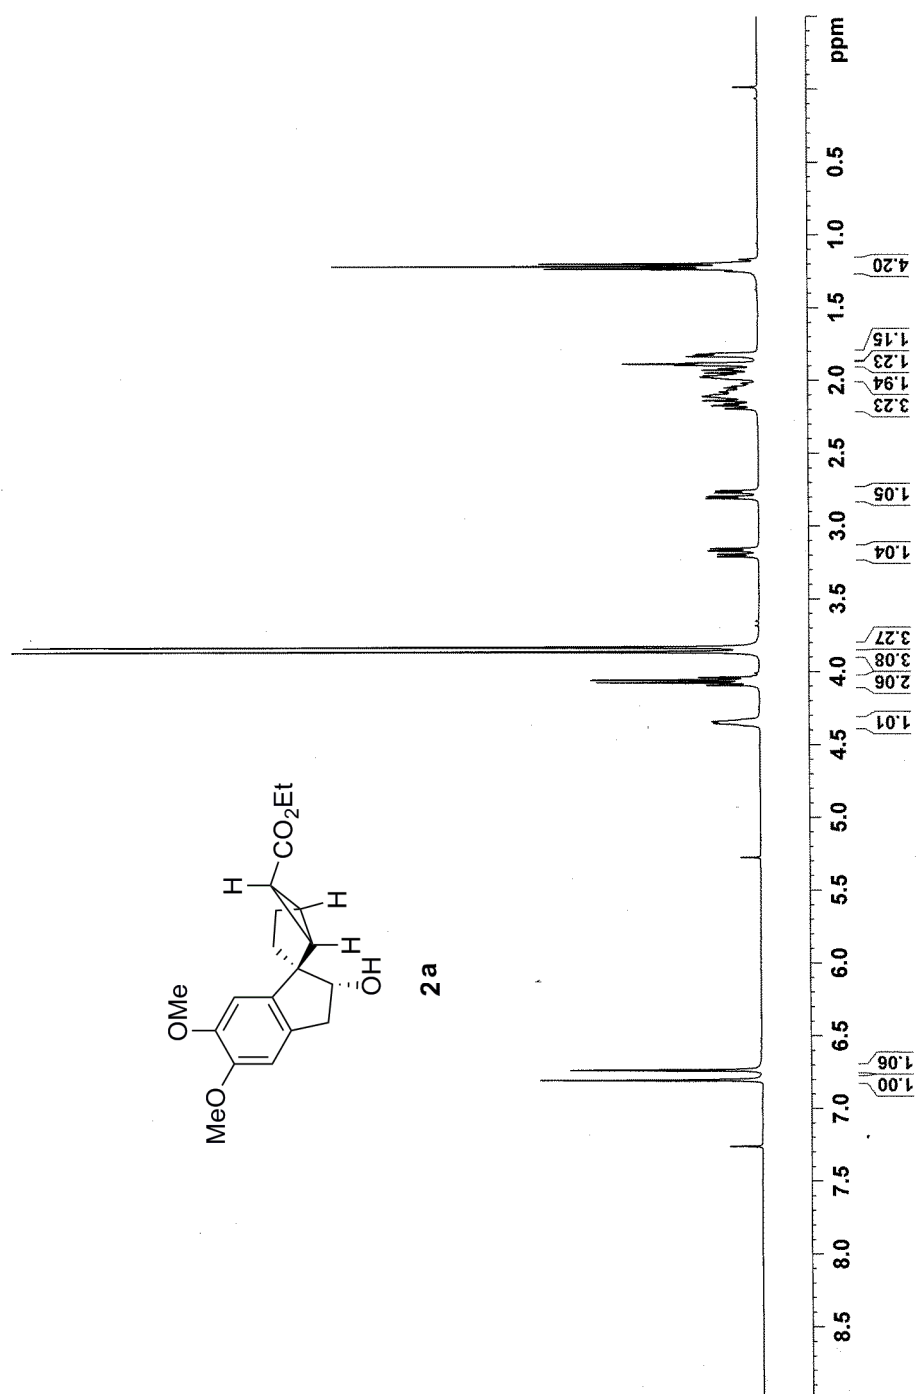

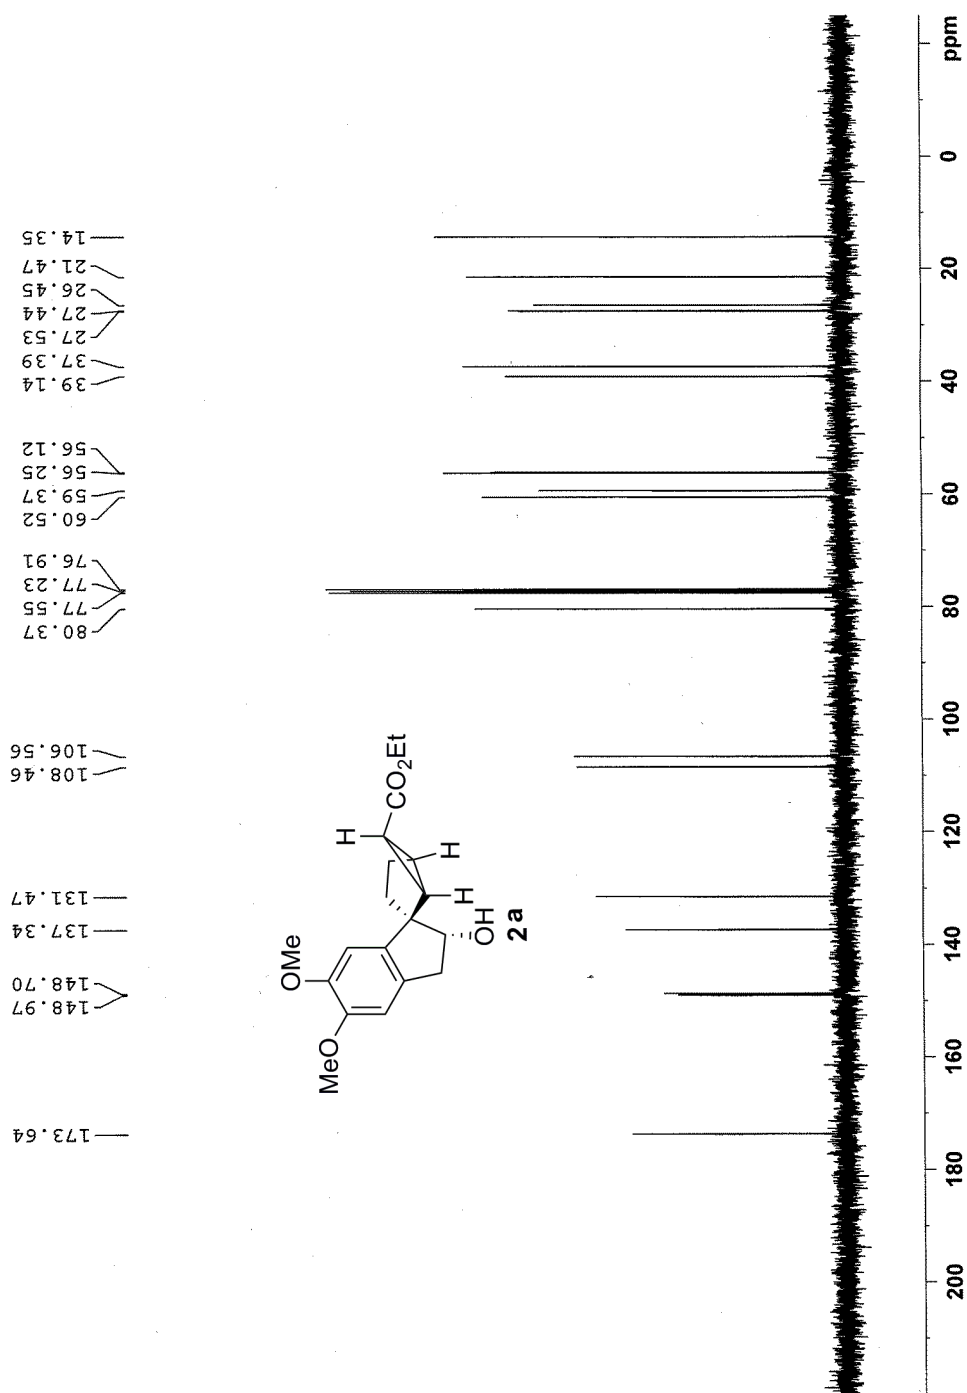

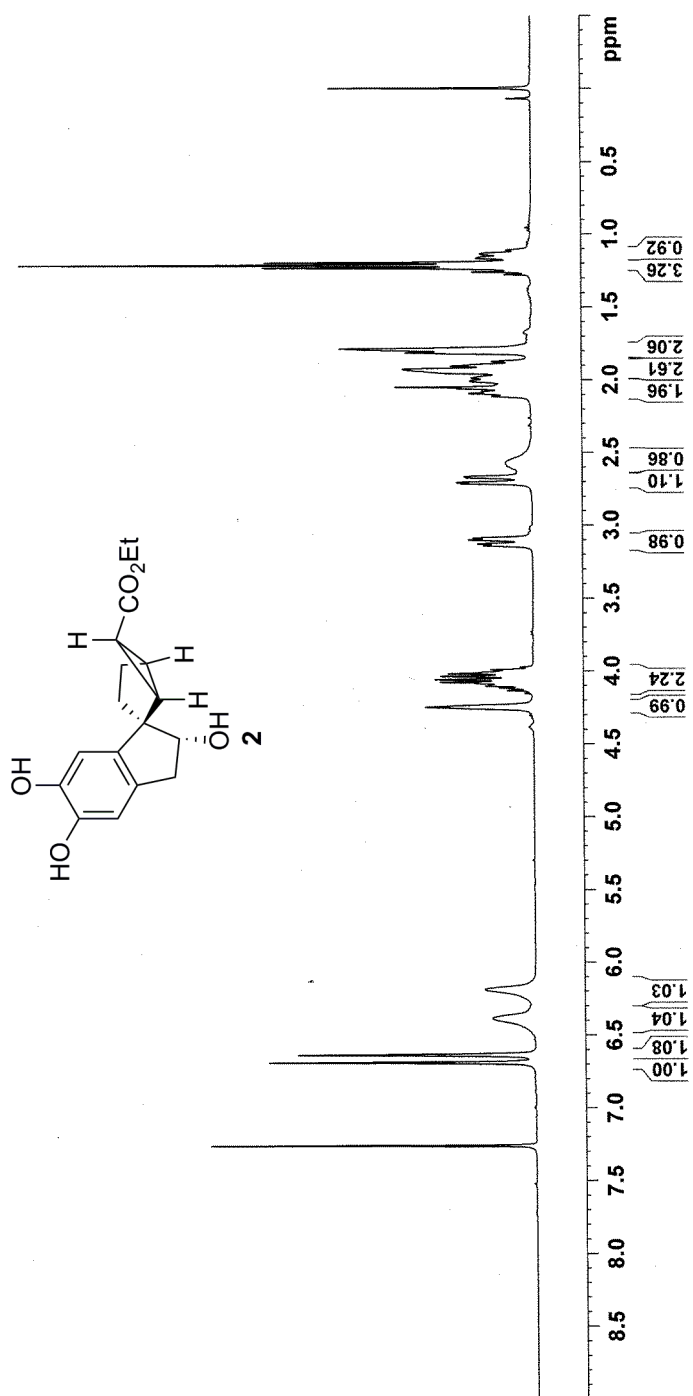

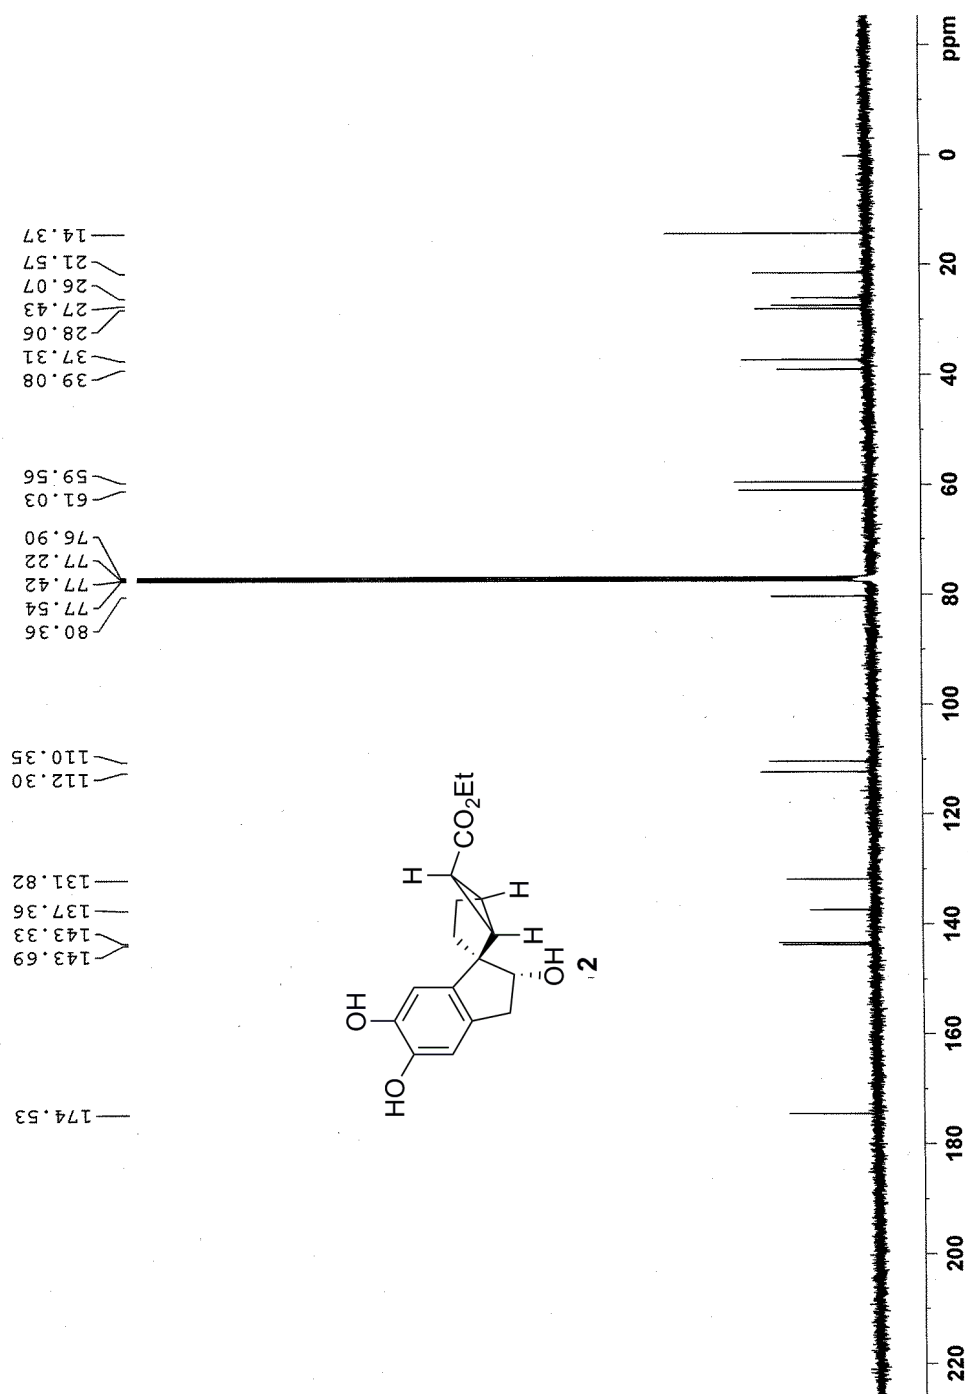



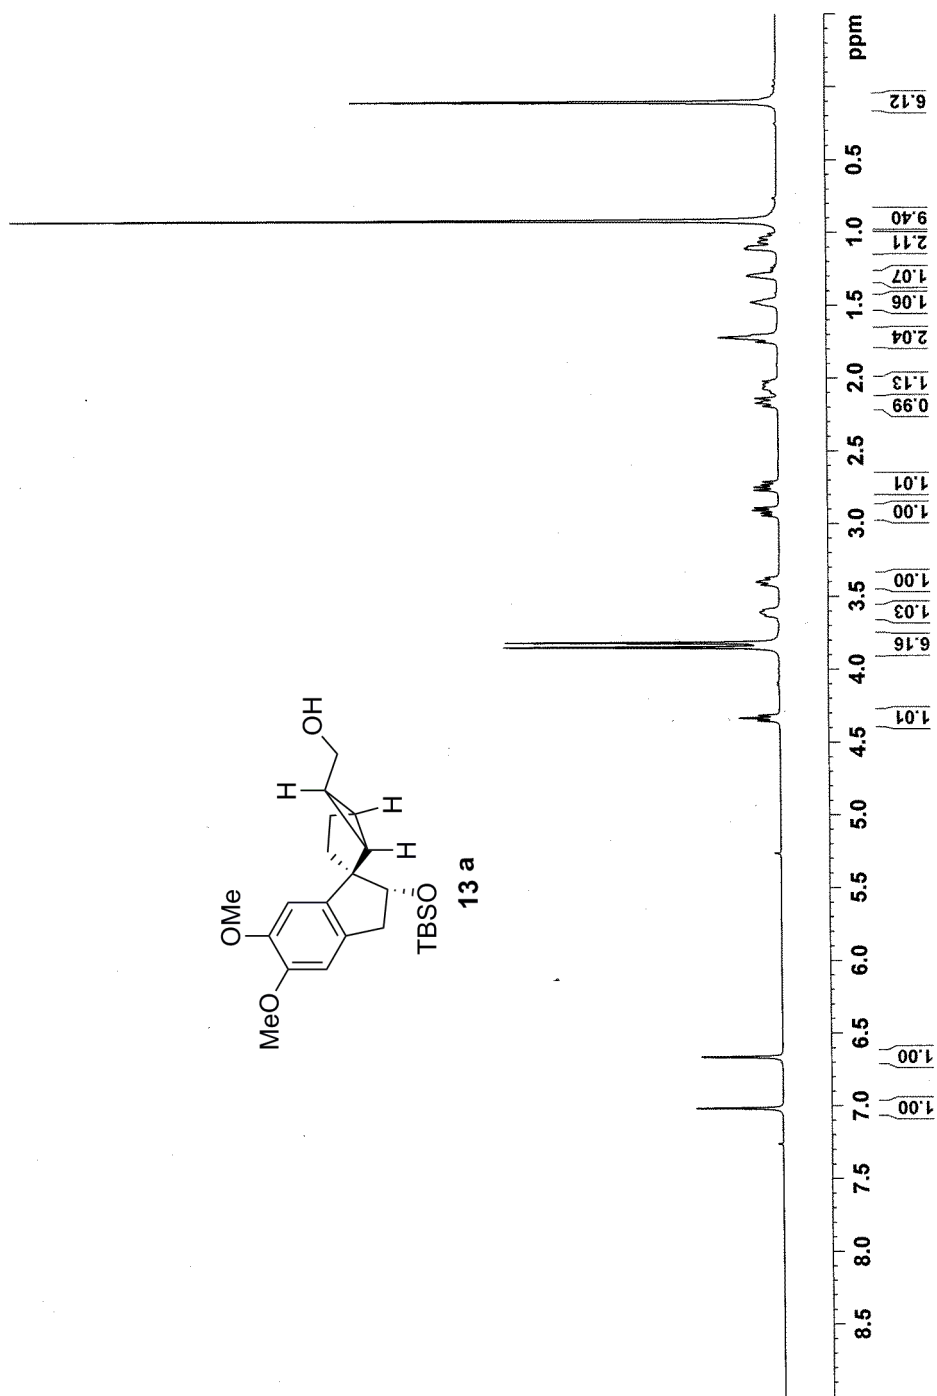

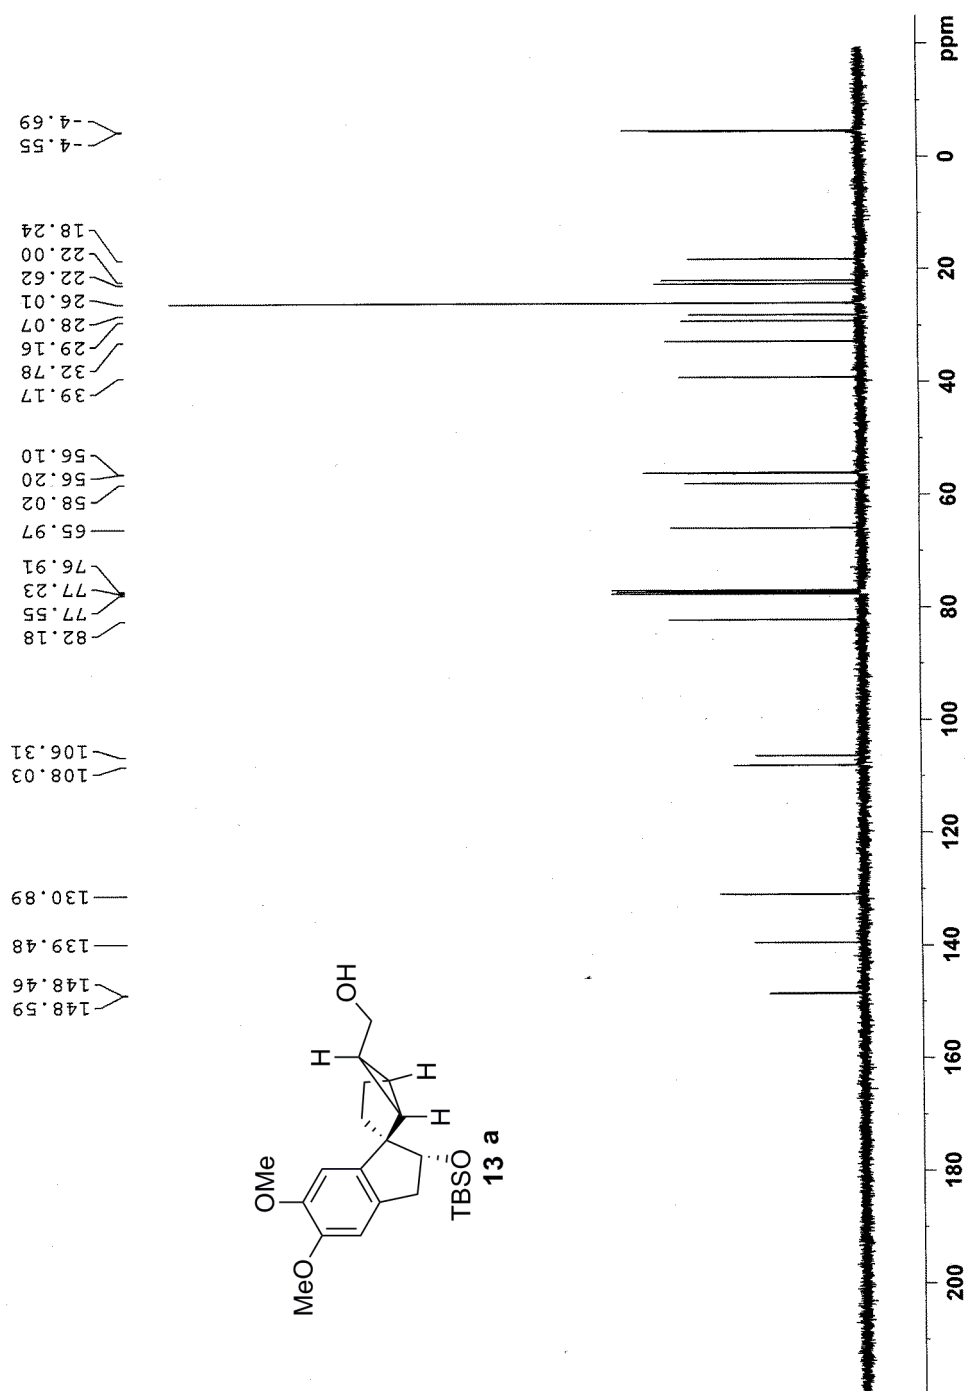

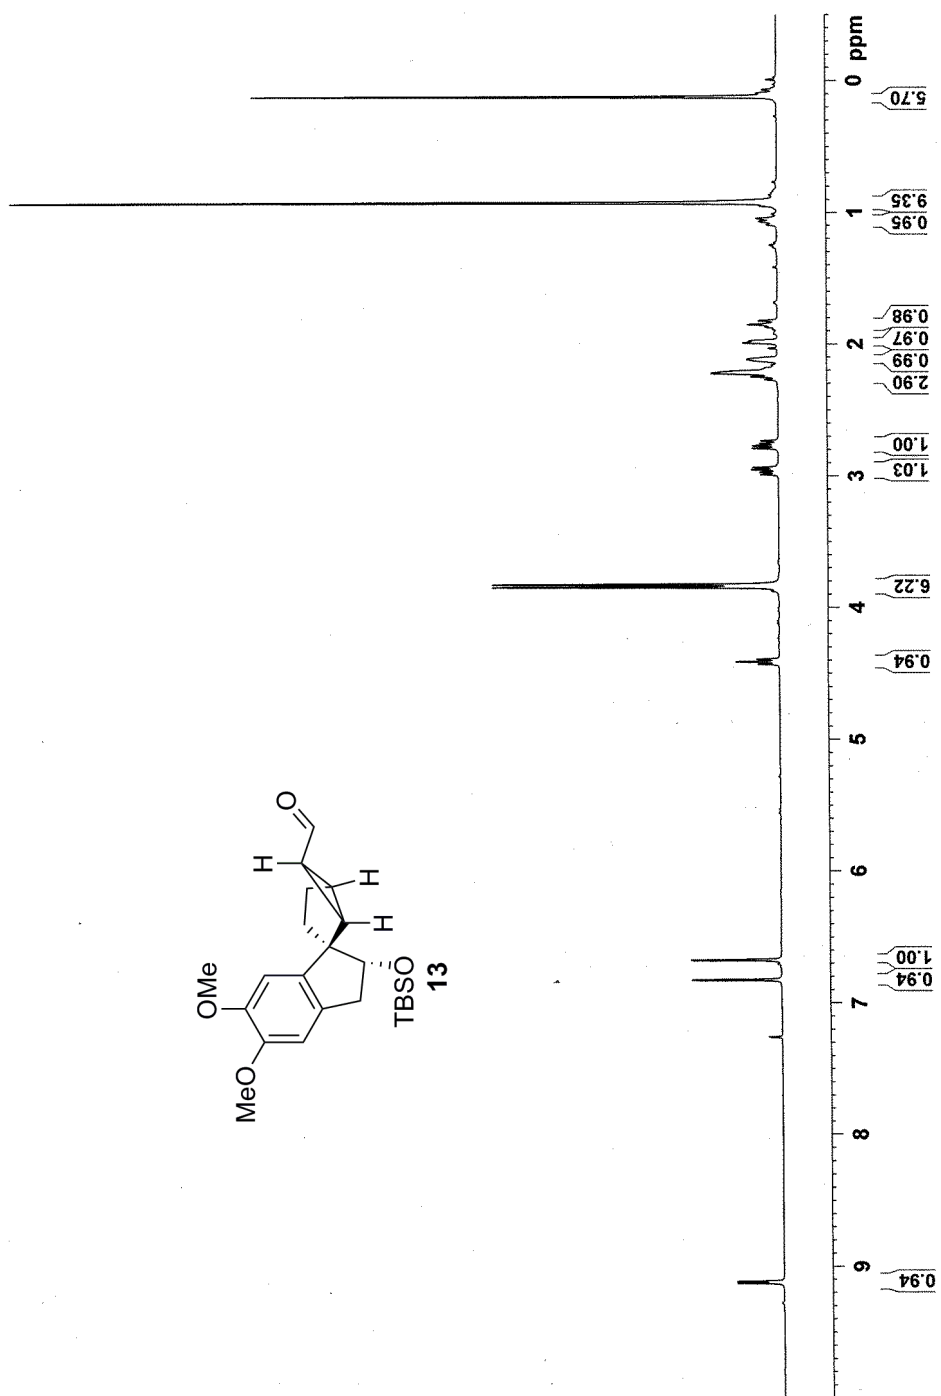

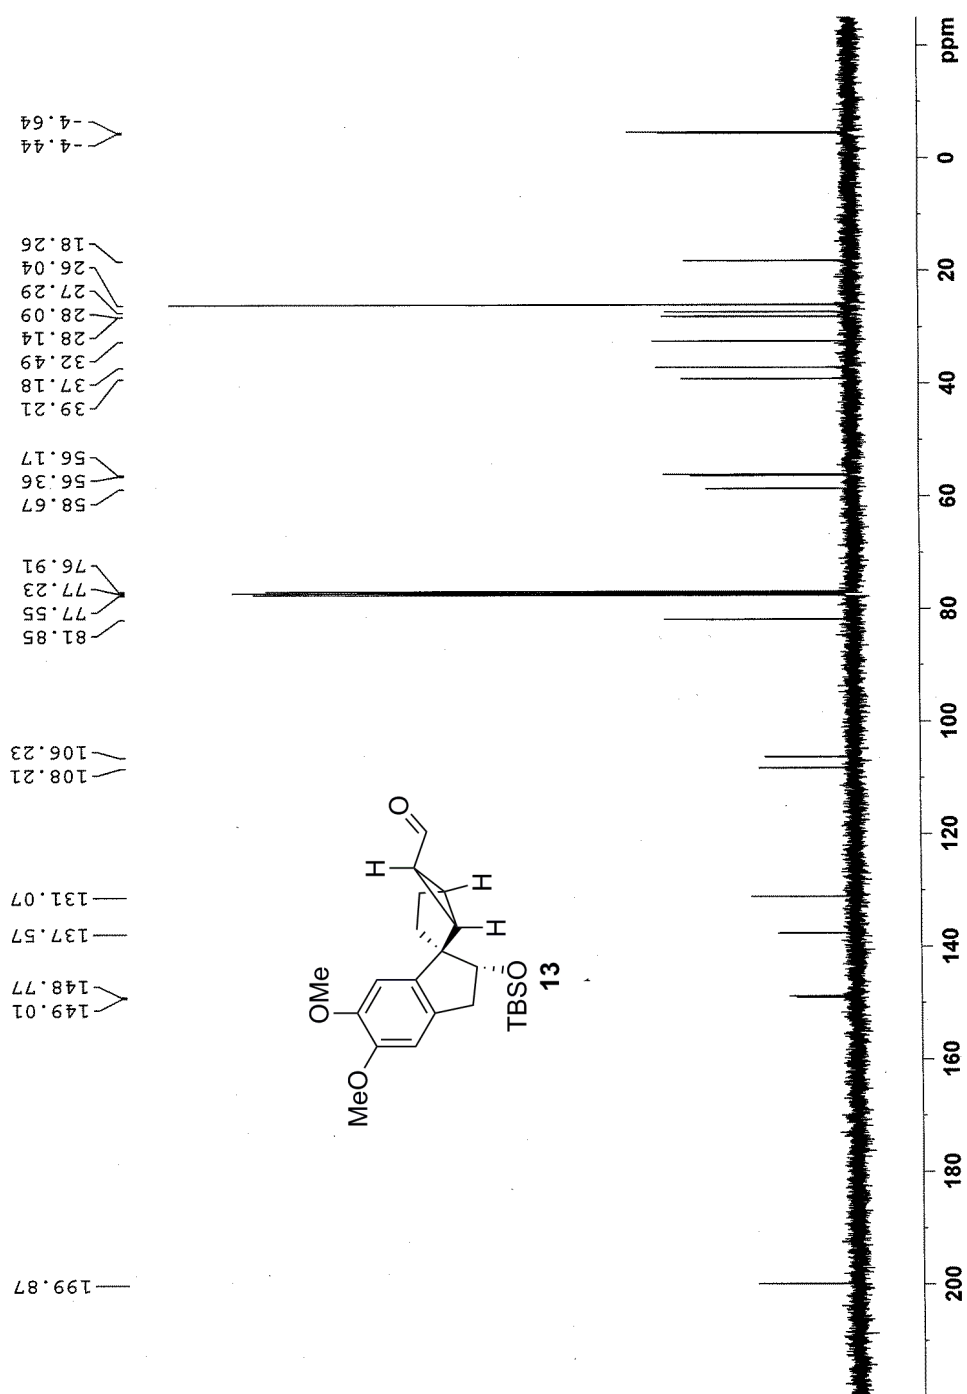

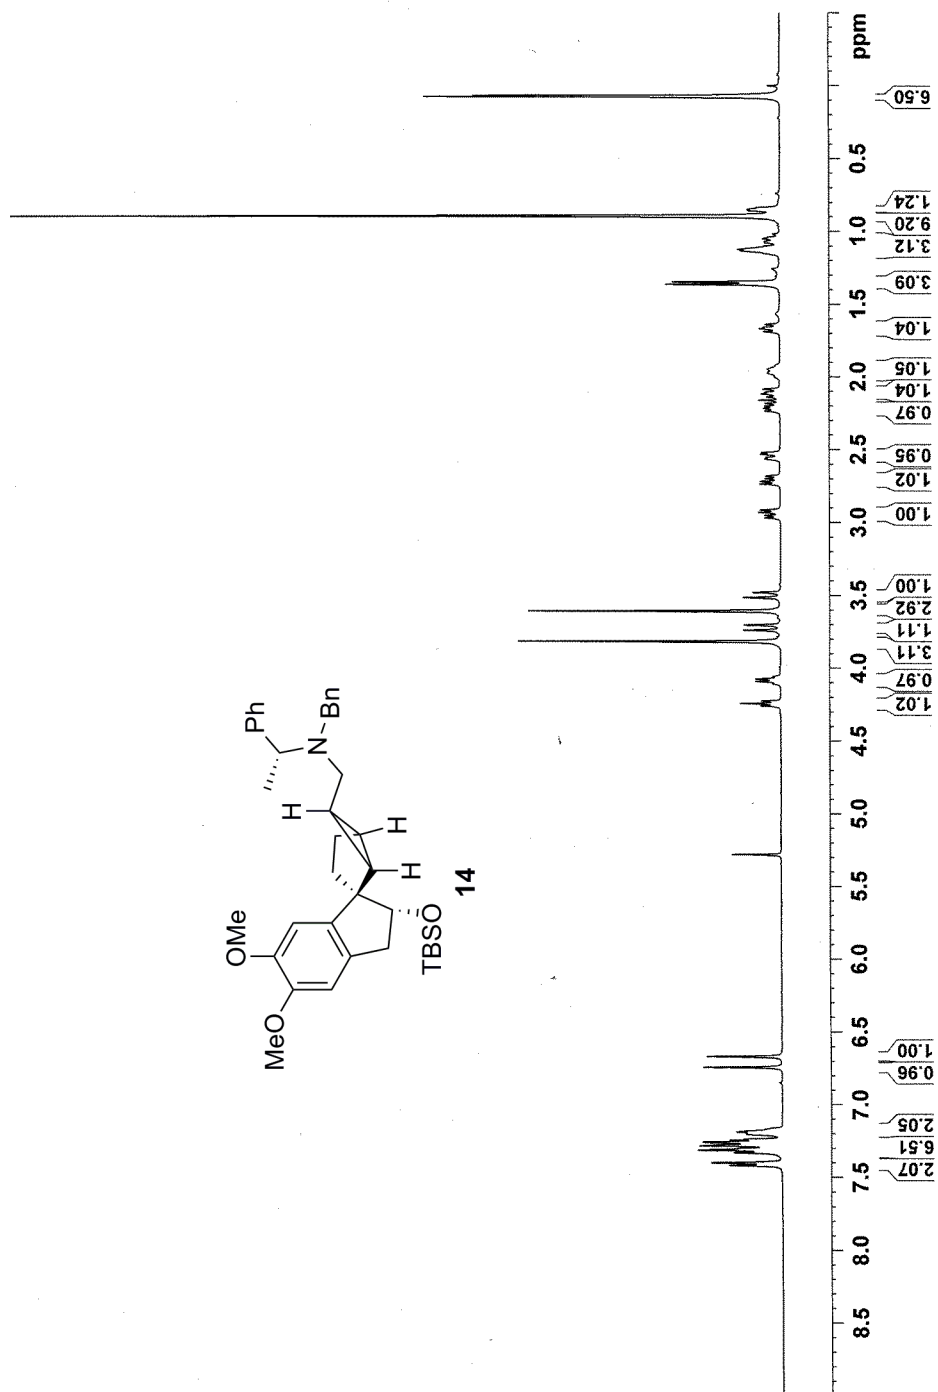

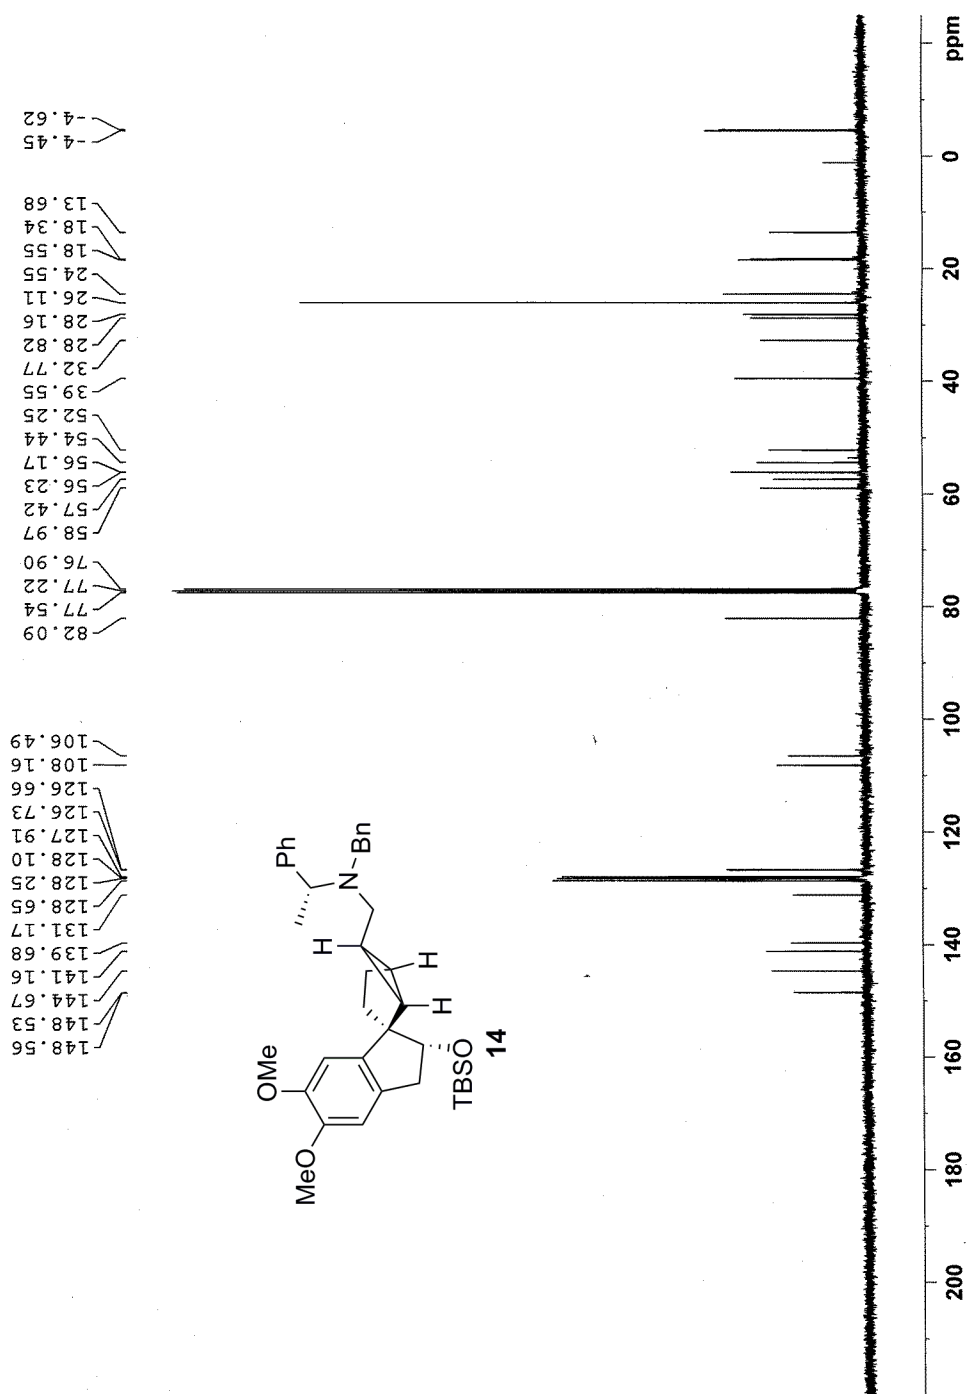

Supplement: c2ob25923k.pdf [file c2ob25923k.pdf]
